# Supplementary material for: Psychiatric disorders and subsequent risk of cardiovascular disease: a longitudinal matched cohort study across three countries
Source: PubMed Central journal article supplement — eClinicalMedicine. 2023 Jun 22;61:102063. doi: 10.1016/j.eclinm.2023.102063 (PMC10329128; doi:10.1016/j.eclinm.2023.102063), 2023-06-22

# Psychiatric disorders and subsequent risk of cardiovascular disease: a longitudinal matched cohort study across three countries

## Supplementary Appendix

### Table of Contents

|                                                                                                                                                                                                                                                                                                                                                                                           |    |
|-------------------------------------------------------------------------------------------------------------------------------------------------------------------------------------------------------------------------------------------------------------------------------------------------------------------------------------------------------------------------------------------|----|
| Table S1. Summary of longitudinal cohort studies on the association between various types of psychiatric disorders and risk of subsequent cardiovascular disease. ....                                                                                                                                                                                                                    | 3  |
| Table S2. International Classification of Diseases (ICD) codes for exposure, outcome, and covariates.....                                                                                                                                                                                                                                                                                 | 21 |
| Table S3. Number and median age at the index date among patients with psychiatric disorders in the sibling as well as population comparisons of the Swedish cohort .....                                                                                                                                                                                                                  | 24 |
| Table S4. Characteristics of patients with psychiatric disorders, their unaffected siblings, and matched reference population - a Danish register-based replication cohort .....                                                                                                                                                                                                          | 25 |
| Table S5. Crude incidence rates (IRs) and hazard ratios (HRs) with 95% confidence intervals (CIs) for incident cardiovascular disease among patients with any psychiatric disorder, compared with their unaffected full siblings or matched reference population, by patient characteristics* .....                                                                                       | 26 |
| Table S6. Crude incidence rates (IRs) and hazard ratios (HRs) with 95% confidence intervals (CIs) for incident cardiovascular disease among patients with any psychiatric disorder, compared to their unaffected full siblings (sibling comparison) or matched reference population (population comparison), by time since psychiatric diagnosis (<1 or ≥1 year).....                     | 28 |
| Table S7. Crude incidence rates (IRs) for different types of incident cardiovascular disease among patients with any psychiatric disorder, their unaffected full siblings and matched reference population, by time since psychiatric diagnosis (<1 or ≥1 year).....                                                                                                                      | 29 |
| Table S8. Crude incidence rates (IRs) and hazard ratios (HRs) and 95% confidence intervals (CI) for incident cardiovascular disease among patients with different types of psychiatric disorder, compared to their unaffected full siblings (sibling comparison) or matched reference population (population comparison), by time since psychiatric diagnosis (<1 year or ≥1 year)* ..... | 30 |
| Figure S1. Flowchart of study design and study participants for Danish replication cohort.....                                                                                                                                                                                                                                                                                            | 32 |
| Figure S2. Schematic diagram for analyses and used datasets across three countries.....                                                                                                                                                                                                                                                                                                   | 34 |
| Figure S3. Disease trajectories toward different cardiovascular diseases among patients with psychiatric disorders (except for autism, N=729 950)* .....                                                                                                                                                                                                                                  | 35 |

|                                                                                                                                                                                                     |           |
|-----------------------------------------------------------------------------------------------------------------------------------------------------------------------------------------------------|-----------|
| <b>Figure S4. Disease trajectories toward different cardiovascular diseases among patients with substance misuse, non-psychotic mood disorders, and anxiety and stress-related disorders*</b> ..... | <b>36</b> |
| <b>Section 1: Description of method - Danish replication cohort</b> .....                                                                                                                           | <b>39</b> |
| <b>Section 2: Description of method - disease trajectory analysis</b> .....                                                                                                                         | <b>43</b> |
| <b>Section 3: Replication of disease trajectories with direct link to incident cardiovascular diseases in Estonian Biobank (EstBB)</b> .....                                                        | <b>44</b> |
| 1. <i>Description of the EstBB database</i> .....                                                                                                                                                   | 44        |
| 2. <i>Construction of replication cohort</i> .....                                                                                                                                                  | 44        |
| 3. <i>Flowchart</i> .....                                                                                                                                                                           | 45        |
| 4. <i>Methods</i> .....                                                                                                                                                                             | 47        |
| <b>Section 4: Output from each step of disease trajectory analysis</b> .....                                                                                                                        | <b>49</b> |
| 1. <i>All psychiatric disorders (except for autism, N=729,950)</i> .....                                                                                                                            | 49        |
| 2. <i>Substance misuse (N=124,189)</i> .....                                                                                                                                                        | 50        |
| 3. <i>Non-psychotic mood disorders (N=159,055)</i> .....                                                                                                                                            | 51        |
| 4. <i>Anxiety and stress-related disorders (N=260,110)</i> .....                                                                                                                                    | 52        |

**Table S1. Summary of longitudinal cohort studies on the association between various types of psychiatric disorders and risk of subsequent cardiovascular disease.**

| Paper                                                  | Study design and database                                                            | Exposure                                                                                                                                                | Outcome                                                                                                                                                                                                                                                                                              | Sample size and follow-up                                                                                | Main findings with adjustment                                                                                                                                                                                                                                                                                                      | Controlled for    |                                                                             |
|--------------------------------------------------------|--------------------------------------------------------------------------------------|---------------------------------------------------------------------------------------------------------------------------------------------------------|------------------------------------------------------------------------------------------------------------------------------------------------------------------------------------------------------------------------------------------------------------------------------------------------------|----------------------------------------------------------------------------------------------------------|------------------------------------------------------------------------------------------------------------------------------------------------------------------------------------------------------------------------------------------------------------------------------------------------------------------------------------|-------------------|-----------------------------------------------------------------------------|
|                                                        |                                                                                      |                                                                                                                                                         |                                                                                                                                                                                                                                                                                                      |                                                                                                          |                                                                                                                                                                                                                                                                                                                                    | familial factors? | other psychiatric comorbidities?                                            |
| <b>Non-affective and affective psychotic disorders</b> |                                                                                      |                                                                                                                                                         |                                                                                                                                                                                                                                                                                                      |                                                                                                          |                                                                                                                                                                                                                                                                                                                                    |                   |                                                                             |
| Søgaard M, 2017 <sup>1</sup>                           | A nationwide registry-based matched cohort study in Denmark                          | Inpatient or hospital-based outpatient diagnosis of schizophrenia, severe depression, or bipolar disorder, among patients with atrial fibrillation (AF) | Stroke, fatal thromboembolic events, and bleeding using hospital diagnoses in the National Patient Register.                                                                                                                                                                                         | 253,741 patients with AF with mean age of 73 years, and 47% were female; followed up to 5 years          | Compared with matched AF patients without any mental disorder, HR of ischemic stroke was 1.37 (95% CI 0.88 to 2.14) for schizophrenia and 1.04 (95% CI 0.69 to 1.56) for bipolar disorder. HR of fatal thromboembolic events was 3.16 (95% CI 1.78 to 5.61) for schizophrenia and 1.53 (95% CI 0.93 to 2.53) for bipolar disorder. | No                | alcohol intake                                                              |
| Foroughi M, 2022 <sup>2</sup>                          | A population-based historical cohort study using the Rochester Epidemiology Project. | Bipolar disorder (BP) diagnosis was validated by chart review.                                                                                          | The primary outcome was the incidence of major adverse cardiac events (MACEs), defined as the composite outcome of myocardial infarction, ischemic and hemorrhagic stroke, percutaneous coronary intervention, coronary artery bypass graft, and death obtained from the electronic medical records. | 288 with BP and 35,326 individuals without BD. Median follow-up was 16.5 years. Mean age was 49.8 years. | Multivariate regression adjusting for age and sex yielded an association between BD and MACE (hazard ratio [HR] = 1.93; 95% confidence interval [CI] = 1.43–2.52). The association remained significant after further adjustment.                                                                                                  | No                | alcohol use disorder, substance use disorder and major depressive disorder. |
| Wu S-I, 2015 <sup>3</sup>                              | A population-based cohort study using nationwide                                     | Schizophrenia or bipolar disorder at age 18 or above                                                                                                    | Incident acute myocardial infarction (AMI) diagnosed from                                                                                                                                                                                                                                            | 70,225 patients with schizophrenia or bipolar disorder and 207,592                                       | HR in men was 1.15 (95% CI 1.01–1.32) for schizophrenia and 1.37 (1.08–1.73) for bipolar                                                                                                                                                                                                                                           | No                | alcohol use disorder,                                                       |

|                               |                                                                                                                       |                                                                                                                                      |                                                                                                                                      |                                                                                                                                                                            |                                                                                                                                                                                                                                                                                                                                                    |    |                                                             |
|-------------------------------|-----------------------------------------------------------------------------------------------------------------------|--------------------------------------------------------------------------------------------------------------------------------------|--------------------------------------------------------------------------------------------------------------------------------------|----------------------------------------------------------------------------------------------------------------------------------------------------------------------------|----------------------------------------------------------------------------------------------------------------------------------------------------------------------------------------------------------------------------------------------------------------------------------------------------------------------------------------------------|----|-------------------------------------------------------------|
|                               | administrative data in Taiwan                                                                                         |                                                                                                                                      | ambulatory care, emergency service, or hospitalization during 1996 to 2007                                                           | randomly selected reference people without serious mental illness; mean age of around 40 years, and about 52% were male; followed up for 11 years                          | disorder; HR in women was 1.85 (1.58~2.18) and 1.88(1.47~2.41) respectively.                                                                                                                                                                                                                                                                       |    | antipsychotic agents, antidepressants, and mood stabilizers |
| Davydow DS, 2016 <sup>4</sup> | A nationwide population-based cohort study in Denmark                                                                 | Serious mental illnesses (SMIs) (e.g., schizophrenia or bipolar disorder) using The Danish Psychiatric Central Register              | Hospitalizations for ambulatory care-sensitive conditions (ACSCs) and rehospitalization for the same or another ACSC, within 30 days | 42,558 patients with schizophrenia/schizoaffective disorder and 25,648 patients with bipolar disorder; mean age of 38.4 years (45% male); followed up over 10 years        | SMI was associated with increased risk for hospitalizations for angina (IRR: 1.14, 95% CI, 1.04–1.25), and congestive heart failure exacerbation (IRR: 1.25; 95% CI, 1.16–1.35)                                                                                                                                                                    | no | substance abuse                                             |
| Prieto ML, 2016 <sup>5</sup>  | A population-based cohort study utilizing a records-linkage system spanning 30 years (1966–1996) in the US            | Bipolar I disorder as a manic episode confirmed by DSM-IV criteria, or a clinical diagnosis of a manic episode in the medical record | Incident fatal and non-fatal myocardial infarction (MI) and stroke confirmed by board-certified cardiologist/neurologist             | 334 patients with bipolar I disorder and 334 age- and sex-matched referents (median age of 37 years, and 52% female); median follow-up of 18.7 years                       | There was an increased risk of fatal or non-fatal MI or stroke (as a composite outcome) in patients with bipolar I disorder [HR 1.54, 95% CI 1.02, 2.33]. After adjusting for baseline cardiovascular risk factors (alcoholism, hypertension, diabetes, and smoking), the risk was no longer significantly increased (HR 1.19, 95% CI 0.76, 1.86). | no | alcohol use disorder                                        |
| Krieger I, 2019 <sup>6</sup>  | A nationwide cohort study based on nationwide data, derived from the Clalit Health Services (CHS) databases in Israel | Schizophrenia registered by a senior psychiatrist or when listed in the diagnoses of discharge letters from a psychiatric hospital   | Ischemic heart disease (IHD) diagnosed by a physician                                                                                | Individuals with schizophrenia (n=10,502) and a matched sample of smoking healthy controls (n=10,502), mean age of both groups was 49.7; mean follow-up time of 12.6 years | Individuals with schizophrenia were at a lower risk of developing IHD (OR=0.76, 95%CI = 0.67-0.85) compared to healthy controls. After controlling for sociodemographic and clinical variables, this association became non-significant (adjusted OR=0.92, 95% CI=0.83-1.03)                                                                       | no | alcohol abuse, and drug abuse                               |

---

**Non-psychotic mood disorders**

---

|                                  |                                                                                                                                                     |                                                                                                                                                                                                           |                                                                                                              |                                                                                                                       |                                                                                                                                                                                                                                                                                                        |    |                                                                                                                     |
|----------------------------------|-----------------------------------------------------------------------------------------------------------------------------------------------------|-----------------------------------------------------------------------------------------------------------------------------------------------------------------------------------------------------------|--------------------------------------------------------------------------------------------------------------|-----------------------------------------------------------------------------------------------------------------------|--------------------------------------------------------------------------------------------------------------------------------------------------------------------------------------------------------------------------------------------------------------------------------------------------------|----|---------------------------------------------------------------------------------------------------------------------|
| Søgaard M, 2017 <sup>1</sup>     | A nationwide registry-based matched cohort study in Denmark                                                                                         | Inpatient or hospital-based outpatient diagnosis of schizophrenia, severe depression, or bipolar disorder, among patients with atrial fibrillation (AF)                                                   | Stroke, fatal thromboembolic events, and bleeding using hospital diagnoses in the National Patient Register. | 253,741 patients with AF with mean age of 73 years, and 47% were female; followed up to 5 years                       | Compared with matched referents, HR of ischemic stroke was 1.36 (95% CI 0.89 to 2.08) for depression. HR of fatal thromboembolic events was 1.31 (95% CI 0.67 to 2.56) for depression.                                                                                                                 | no | alcohol intake                                                                                                      |
| Davydow DS, 2015 <sup>7</sup>    | Retrospective cohort study with a population-based sample of Americans >50 years participating in the Health and Retirement Study (HRS) (1998-2008) | Depression was defined as either a score of $\geq 4$ on the 8-item Center for Epidemiologic Studies Depression Scale (CES-D-8) at the baseline interview or a depression diagnosis in the Medicare claims | Hospitalized ischemic stroke                                                                                 | 7,031 Americans >50 years old, and 42% male; followed up from 1998 or 2000 until 2008 or death                        | Co-occurring depression and cognitive impairment without dementia (OR: 1.65, 95%CI: 1.24, 2.18) was associated with odds of ischemic stroke. Depression alone was not associated with odds of ischemic stroke (OR: 1.11, 95%CI: 0.88, 1.40)                                                            | no | comorbidities using Charlson Index                                                                                  |
| Egeberg A, 2015 <sup>8</sup>     | A Danish nationwide register-based cohort study                                                                                                     | Patients with psoriasis with concurrent depression (prescription of antidepressant medication from pharmacy)                                                                                              | Incident atrial fibrillation (AF) and stroke from registers                                                  | 5,251,888 adults including 67,853 patients with psoriasis, mean age 42.9 and 49.3% male; followed up during 1997-2011 | HR for AF was 1.19 (95% CI 1.06–1.33) in patients with mild psoriasis and depression, and 1.74 (95% CI 1.43–2.11) in patients with severe psoriasis and depression. HR of stroke was 1.63 (95% CI 1.43–1.85) and 2.47 (95% CI 2.07–2.95), respectively.                                                | no | comorbidities using Charlson Index                                                                                  |
| Fenger-Grøn M, 2019 <sup>9</sup> | A Danish nationwide register-based matched cohort study                                                                                             | Depression and subsequent antidepressant treatment as identified by first-time antidepressant prescription redemption in the registered period                                                            | Incident atrial fibrillation (AF) from inpatient or outpatient records                                       | 785,254 depressed patients and 1:5 matched population controls, 40.8% male; followed up from 2000 to 2013             | During the first month after antidepressant therapy initiation, the HR was 3.18 (95% CI: 2.98–3.39) for AF. This association gradually attenuated over the following year (HR=1.37; 95% CI: 1.31–1.44 during 2–6 months after, and HR=1.11; 95% CI: 1.06–1.16 during 6–12 months after the initiation. | no | comorbidities including history of Schizophrenia or schizoaffective disorder, bipolar disorder, and substance abuse |

|                               |                                                                                                                                     |                                                                                                                                             |                                                                                                                                                                   |                                                                                                                                                                     |                                                                                                                                                                                                                                                                                                                                                                                                            |    |         |
|-------------------------------|-------------------------------------------------------------------------------------------------------------------------------------|---------------------------------------------------------------------------------------------------------------------------------------------|-------------------------------------------------------------------------------------------------------------------------------------------------------------------|---------------------------------------------------------------------------------------------------------------------------------------------------------------------|------------------------------------------------------------------------------------------------------------------------------------------------------------------------------------------------------------------------------------------------------------------------------------------------------------------------------------------------------------------------------------------------------------|----|---------|
| Huang C-J, 2013 <sup>10</sup> | A matched cohort study with a random sample from the Taiwan National Health Insurance Program                                       | Newly diagnosed depression on at least two occasions between 2000 and 2007                                                                  | Composite of coronary events including myocardial infarction (MI), percutaneous coronary intervention (PCI), or coronary artery bypass grafting (CABG) procedures | 39,685 individuals (7937 with depression and 31,748 without depression) aged 20–99 years were followed up for a median period of 8.76 years; 37.4% were male        | The HR for newly detected coronary events was 1.49 (95% CI= 1.29–1.74) for individuals with depression compared to age- and gender- matched individuals without depression.                                                                                                                                                                                                                                | no | no      |
| Jee YH, 2019 <sup>11</sup>    | A Korean population-based cohort study using the Database of National Health Insurance System                                       | Depression was defined as the hospital outpatient use and diagnosis of depression or history of medication for depression                   | First atherosclerotic cardiovascular disease (ASCVD) from hospital admission or death                                                                             | 481,355 Koreans (260,695 men and 220,660 women) aged 40–80 years who had a biennial health check-up between 2002 and 2005; mean age 52.8 years                      | Depression increased the risk of developing ASCVD by 41% for men and 48% for women. In men, 3–4 outpatient visits for depression increased the risk of angina pectoris by 2.12 times (95% CI 1.55 to 2.90) and acute myocardial infarction by 2.29 times (95% CI 1.33 to 3.95). Depression was also associated with stroke in men (HR 1.29, 95% CI 1.19 to 1.39) and women (HR 1.37, 95% CI 1.29 to 1.46). | no | no      |
| Lee CW-S, 2015 <sup>12</sup>  | A population-based retrospective cohort study using data from the Longitudinal Health Insurance Database 2000 of Taiwan (2000-2011) | Newly diagnosed depression from the Longitudinal Health Insurance Database                                                                  | Venous thromboembolism (VTE) was determined by linking patient records with ambulatory and inpatient care data                                                    | 35,274 depressed patients and a non-depression cohort comprising 70,548 patients matched according to sex, age, and index year; mean age of 48 years and 38.4% male | Depressed patients had a 1.38-fold greater risk (95% CI= 1.09–1.73) of developing VTE.                                                                                                                                                                                                                                                                                                                     | no | no      |
| Liu N, 2016 <sup>13</sup>     | A mega-cohort of Chinese adults from the China Kadoorie Biobank (CKB) Study with over 0.5 million adults aged 30 to 79 years        | Major depression (MD) was measured with the modified Chinese version of Composite International Diagnostic Interview-Short Form at baseline | Incident ischemic heart disease (IHD) was identified through linkage to established disease registries and national health insurance claim databases              | 486,541 participants with a median age of 51 years, and 40.9% were male; median follow-up of 7.2 years                                                              | MD patients had a higher risk of IHD (HR 1.32; 95% CI 1.15–1.53).                                                                                                                                                                                                                                                                                                                                          | no | no      |
| Mathur R, 2016 <sup>14</sup>  | A prospective cohort study between 2005 and 2015                                                                                    | Anxiety and depressive disorders were selected from the primary care database                                                               | Incident non-fatal myocardial infarction (MI) and stroke                                                                                                          | 524,952 patients with mean age of 35.9 years,                                                                                                                       | Depression was independently associated with both MI (HR 1.21,                                                                                                                                                                                                                                                                                                                                             | no | anxiety |

|                                 |                                                                                                                                                       |                                                                                                                             |                                                                                                                                                                                                                         |                                                                                                                        |                                                                                                                                                                                                                                                                                                                   |    |                             |
|---------------------------------|-------------------------------------------------------------------------------------------------------------------------------------------------------|-----------------------------------------------------------------------------------------------------------------------------|-------------------------------------------------------------------------------------------------------------------------------------------------------------------------------------------------------------------------|------------------------------------------------------------------------------------------------------------------------|-------------------------------------------------------------------------------------------------------------------------------------------------------------------------------------------------------------------------------------------------------------------------------------------------------------------|----|-----------------------------|
|                                 | from the east London primary care database                                                                                                            |                                                                                                                             |                                                                                                                                                                                                                         | and 52.8% were male; followed up to 10 years                                                                           | 95% CI 1.05-1.39) and stroke (HR 1.29, 95% CI 1.00-1.66).                                                                                                                                                                                                                                                         |    |                             |
| O'Neil A, 2016 <sup>15</sup>    | A prospective longitudinal study of a representative sample of women enrolled in the Geelong Osteoporosis Study (1993–2011) in Australia              | Depressive disorder using the Structured Clinical Interview for Diagnostic and Statistical Manual of Mental Disorders       | Incident coronary heart disease (CHD) from hospital medical records                                                                                                                                                     | 860 women with mean age of 48 years; followed up for 18 years                                                          | Baseline depression predicted 18-year incidence, adjusting for anxiety (OR:2.39; 95% CI:1.19–4.82)                                                                                                                                                                                                                | no | anxiety                     |
| Parkin L, 2017 <sup>16</sup>    | A large prospective study of UK women recruited through the National Health Service Breast Screening Programme in England and Scotland                | Depression and regular use of medications from questionnaire                                                                | Venous thromboembolism (VTE) through linkage to routinely collected National Health Service statistics                                                                                                                  | 734,092 women with a mean age of 59.9 years; followed up for an average of 7.3 years                                   | Antidepressant users had a higher risk of VTE than women had neither depression nor use of psychotropic drugs (HR, 1.39; 95% CI, 1.23–1.56). VTE risk was not increased in women being treated for depression or anxiety but not using antidepressants or other psychotropic drugs (HR, 1.19; 95% CI, 0.95–1.49). | no | use of other antipsychotics |
| Patten SB, 2008 <sup>17</sup>   | A longitudinal population-based cohort study from the Canadian National Population Health Survey (NPHS) every 2 years between 1994 and 2002           | Major depression (MD) assessed from the composite International Diagnostic Interview Short Form                             | Chronic medical conditions including heart disease and hypertension, from self-reported survey                                                                                                                          | 15,254 respondents with age over 12 years                                                                              | The risk was elevated for heart disease (HR, 1.4,1.0-2.1) and hypertension (HR1.6, 1.2-2.2) in relation to MD at baseline interview.                                                                                                                                                                              | no | no                          |
| Pelletier R, 2015 <sup>18</sup> | DECADE (Depression Effects on Coronary Artery Disease Events), a prospective observational study of patients referred at the Montreal Heart Institute | Depression and anxiety disorders were assessed at baseline using the Primary Care Evaluation of Mental Disorders (PRIME-MD) | Major adverse cardiovascular events (MACE), including cardiac mortality, non-fatal myocardial infarction (MI), revascularization procedures, and cerebrovascular events (i.e., stroke), among patients with and without | 2,390 patients with mean age of around 56 years, and 30-40% were female; followed for 8.8 years, between 1998 and 2009 | Neither depression nor anxiety was associated with MACE among patients with or without CAD.                                                                                                                                                                                                                       | no | anxiety                     |

|                              |                                                                                                           |                                                                                                                                                               |                                                                                                                                                            |                                                                                                                                                              |                                                                                                                                                                                                                                                                                                                                                                                                                                                                                                                                                                                                                                                                                                                                                                                                                           |    |                                                   |
|------------------------------|-----------------------------------------------------------------------------------------------------------|---------------------------------------------------------------------------------------------------------------------------------------------------------------|------------------------------------------------------------------------------------------------------------------------------------------------------------|--------------------------------------------------------------------------------------------------------------------------------------------------------------|---------------------------------------------------------------------------------------------------------------------------------------------------------------------------------------------------------------------------------------------------------------------------------------------------------------------------------------------------------------------------------------------------------------------------------------------------------------------------------------------------------------------------------------------------------------------------------------------------------------------------------------------------------------------------------------------------------------------------------------------------------------------------------------------------------------------------|----|---------------------------------------------------|
| Ting RZW, 2013 <sup>19</sup> | A 7-year prospective study of the Hong Kong Diabetes Registry                                             | Major depression assessed by psychiatrists in public hospitals                                                                                                | coronary artery disease (CAD)<br>Cardiovascular disease (CVD) was defined as coronary heart disease (CHD) and/or stroke and/or peripheral vascular disease | 7835 Hong Kong Chinese with type 2 diabetes (median age of 56), and 47% were male; median follow-up of 7.4 years                                             | Depression independently predicted CVD [HR=2.18 (95% CI=1.45-3.27)], mainly due to stroke [HR=3.55 (95% CI = 2.15-5.84)]                                                                                                                                                                                                                                                                                                                                                                                                                                                                                                                                                                                                                                                                                                  | no | no                                                |
| Tsai T-Y, 2017 <sup>20</sup> | A population-based matched cohort study using Taiwan's Longitudinal Health Insurance Database (1997-2010) | Rheumatoid arthritis (RA) comorbid with depression from insurance claims data                                                                                 | Incident stroke                                                                                                                                            | 8045 subjects with a newly diagnosed RA, together with 32,600 subjects without RA matched by age, gender and index date; mean age of 55 years; 31% were male | Patients with RA with comorbid depression had increased risk of stroke (HR 2.18; 95% CI 1.87 to 2.54). Those with RA only or those with depression only had also a higher risk of stroke by 43% and 57% as compared with individuals without either condition. HIV+ individuals with MDD had a higher risk of HF (HR, 1.68; 95% CI, 1.45–1.95) compared with HIV– individuals without MDD. MDD was associated with HF among both HIV– and HIV+ individuals (HR 1.21; 95% CI, 1.06–1.37; and HR, 1.29; 95% CI, 1.11–1.51, respectively). There was a 49% increased odds of recurrent stroke in patients with PSD, compared to patients without PSD (OR = 1.49, 95%CI: 1.03–2.15). There was no significant association between use of antidepressant drugs and the risk of recurrent stroke (OR = 1.96, 95%: CI 0.95–4.04) | no | no                                                |
| White JR, 2015 <sup>21</sup> | Veterans Aging Cohort Study (VACS)                                                                        | Major depressive disorder (MDD) comorbid with HIV infection from medical records                                                                              | Incident heart failure (HF) from medical records                                                                                                           | 81,427 individuals with a mean age of 48; 95% were male; 5.8 years of follow-up                                                                              | MDD was associated with HF among both HIV– and HIV+ individuals (HR 1.21; 95% CI, 1.06–1.37; and HR, 1.29; 95% CI, 1.11–1.51, respectively). There was a 49% increased odds of recurrent stroke in patients with PSD, compared to patients without PSD (OR = 1.49, 95%CI: 1.03–2.15). There was no significant association between use of antidepressant drugs and the risk of recurrent stroke (OR = 1.96, 95%: CI 0.95–4.04)                                                                                                                                                                                                                                                                                                                                                                                            | no | alcohol abuse and cocaine abuse                   |
| Yuan HW, 2012 <sup>22</sup>  | A multi-centered prospective cohort study among patients with acute stroke in China                       | Poststroke depression (PSD) was diagnosed according to the criteria set by the Diagnostic and Statistical Manual of Mental Disorders, fourth edition (DSM-IV) | Recurrent stroke at 1 year followed up via face-to-face or phone interview                                                                                 | 1713 patients with acute stroke with mean age of 61.5 years, and 34.4% were female; 1 year of follow up                                                      | There was a 49% increased odds of recurrent stroke in patients with PSD, compared to patients without PSD (OR = 1.49, 95%CI: 1.03–2.15). There was no significant association between use of antidepressant drugs and the risk of recurrent stroke (OR = 1.96, 95%: CI 0.95–4.04)                                                                                                                                                                                                                                                                                                                                                                                                                                                                                                                                         | no | high alcohol consumption                          |
| Zivin K, 2015 <sup>23</sup>  | A retrospective cohort study in the Veterans Health Administration in the United States who               | Depression based on depression diagnoses recorded during an inpatient stay or any                                                                             | Cause of death was obtained from the National Death Index (NDI)                                                                                            | 5,078,082 patients treated in Veterans Health Administration (VHA) settings with mean age of                                                                 | Depression was associated with a higher hazard of three-year mortality from heart disease (HR 1.155, 1.133-1.177),                                                                                                                                                                                                                                                                                                                                                                                                                                                                                                                                                                                                                                                                                                        | no | psychiatric hospitalizations (0, ≥1); psychiatric |



|                                |                                                                                           |                                                                                                     |                                                                                                                                                                                                      |                                                                                                |                                                                                                                                                                                                                                                                                                                                                                                                                                                                                                  |    |                                                                                                                                                              |
|--------------------------------|-------------------------------------------------------------------------------------------|-----------------------------------------------------------------------------------------------------|------------------------------------------------------------------------------------------------------------------------------------------------------------------------------------------------------|------------------------------------------------------------------------------------------------|--------------------------------------------------------------------------------------------------------------------------------------------------------------------------------------------------------------------------------------------------------------------------------------------------------------------------------------------------------------------------------------------------------------------------------------------------------------------------------------------------|----|--------------------------------------------------------------------------------------------------------------------------------------------------------------|
|                                | received treatment in a VA facility at least once during fiscal year 2006                 | outpatient visit during two years prior to the index date                                           |                                                                                                                                                                                                      | 62.6 years, and 91.7% were male; followed up for 3 years                                       | cerebrovascular disease (HR 1.437, 1.376-1.502), and hypertension (HR 1.184, 1.080-1.297).                                                                                                                                                                                                                                                                                                                                                                                                       |    | comorbidities (anxiety and/or PTSD, serious mental illness (bipolar disorder, schizophrenia, and other psychoses), nicotine use, and substance use disorder) |
| Pratt LA, 1996 <sup>24</sup>   | Prospective data from the Baltimore cohort of the Epidemiologic Catchment Area Study      | Major depressive episode                                                                            | Self-reported myocardial infarction (MI)                                                                                                                                                             | 1551 respondents free of heart trouble, and 26-40% were male; followed up for 13 years         | A history of major depressive episode was associated with a higher risk of MI (OR 4.54; 95% CI, 1.65 to 12.44), independent of coronary risk factors.                                                                                                                                                                                                                                                                                                                                            | no | alcohol abuse, panic disorder, and phobia                                                                                                                    |
| Khambaty T, 2016 <sup>25</sup> | A veterans aging cohort study with HIV-infected adults in the US                          | Major depressive disorder (MDD) and dysthymic disorder                                              | Incident acute myocardial infarction (AMI) defined by discharge summary documentation, enzyme/electrocardiography evidence of AMI, inpatient ICD-9 code for AMI, or AMI as underlying cause of death | 26,144 HIV-infected veterans (mean age 48 years) and 97% were male; followed up for 5.8 years  | Baseline MDD was associated with incident AMI after adjusting for demographics (HR, 1.31; 95% CI, 1.05-1.62), CVD risk factors (HR, 1.29; 95% CI, 1.04-1.60), and HIV-specific factors (HR, 1.30; 95% CI, 1.05-1.62). Further adjustment for hepatitis C, renal disease, substance abuse, and hemoglobin level (HR, 1.25; 95% CI, 1.00-1.56) and antidepressant use (HR, 1.12; 95% CI, 0.87-1.42) attenuated the associations. Baseline dysthymic disorder was not associated with incident AMI. | no | substance abuse and antidepressant use                                                                                                                       |
| Sun J, 2016 <sup>26</sup>      | A prospective study of 0.5 million Chinese adults using the China Kadoorie Biobank cohort | Major depressive episodes (MDE) using a WHO composite international diagnostic interview-Short Form | Stroke events were ascertained through death certificates, medical records, and health insurance data                                                                                                | 199,294 men and 288,083 women aged 30 to 79 years (mean age of 51 years; 40.9% male); followed | Past year MDE was marginally associated with a 15% increased risk of stroke (adjusted HR, 1.15; 95% CI, 0.99-1.33). There was a positive dose-response relationship                                                                                                                                                                                                                                                                                                                              | no | alcohol use                                                                                                                                                  |

|                              |                                                                             |                                                                                                                                           |                                                                                                                                                                 |                                                                                                                                                                              |                                                  |                                                                                                                                                                                                                                                                                                                                                                                                                                             |    |                                                                         |
|------------------------------|-----------------------------------------------------------------------------|-------------------------------------------------------------------------------------------------------------------------------------------|-----------------------------------------------------------------------------------------------------------------------------------------------------------------|------------------------------------------------------------------------------------------------------------------------------------------------------------------------------|--------------------------------------------------|---------------------------------------------------------------------------------------------------------------------------------------------------------------------------------------------------------------------------------------------------------------------------------------------------------------------------------------------------------------------------------------------------------------------------------------------|----|-------------------------------------------------------------------------|
| Almas A, 2019 <sup>27</sup>  | A longitudinal cohort study on mental health, work, and relations in Sweden | Depression assessed using the Major Depression Inventory (MDI) and self-reported data on non-cardiovascular morbidity in 1998–2000        | Outcomes of cardiovascular disease (CVD) were assessed using the National Patient Register                                                                      | 10,443 adults (aged 20–64 years) with median age of 41–52 years, and 44% were male; followed from 2001 to 2014                                                               | from 2004 to 2013, median of follow-up 7.2 years | between the number of depression symptoms and increased stroke risk ( $P_{\text{trend}}=0.011$ ). Both depression (HR 1.5; 95% CI, 1.1, 2.0) and non-cardiovascular morbidity (HR 2.0; 95% CI, 1.8, 2.6) were associated with an increased future risk of CVD. The combined effect of depression and non-cardiovascular comorbidity on future CVD was HR 2.1 (95%, CI 1.3, 3.4) after adjusting for age, gender and socioeconomic position. | no | psychiatric disorders (other than depression) and hazardous alcohol use |
| Prigge R, 2022 <sup>28</sup> | A large prospective cohort study based on UK Biobank.                       | Depression was defined as at least one of: self-report of depression or antidepressant use; or hospital record of depression at baseline. | Major cardiovascular events (MCVE), defined as first-ever fatal or non-fatal stroke or myocardial infarction from routinely collected health and death records. | 466,238 UK Biobank participants, aged 40–69 years without cardiovascular disease, bipolar disorder or schizophrenia at baseline. Median age was 57 years and 44.2% was male. |                                                  | Depression was associated with increased risks of MCVE (adjusted HR, 95% CI: 1.28, 1.19–1.38;)                                                                                                                                                                                                                                                                                                                                              | no | no                                                                      |

---

### Anxiety and stress-related disorders

---

|                                |                                                                                              |                                                                               |                                                                                                          |                                                                                            |  |                                                                                                                                                                                                        |    |            |
|--------------------------------|----------------------------------------------------------------------------------------------|-------------------------------------------------------------------------------|----------------------------------------------------------------------------------------------------------|--------------------------------------------------------------------------------------------|--|--------------------------------------------------------------------------------------------------------------------------------------------------------------------------------------------------------|----|------------|
| Jackson CA, 2016 <sup>29</sup> | An Australian longitudinal study on women's health, surveyed every 3 years from 1998 to 2013 | Anxiety defined using self-reported doctor-diagnosis                          | Incident hypertension was defined as first reported occurrence of hypertension from self-reported survey | 9126 women, mean age 49.5 years with follow-up of 12 years                                 |  | Anxiety was associated with increased odds of hypertension (OR 1.24, 95% CI 1.09 to 1.42), but this association became non-significant after adjusting for all factors (OR 1.06, 95% CI 0.90 to 1.24). | no | depression |
| Mathur R, 2016 <sup>14</sup>   | A prospective cohort study between 2005 and 2015 from the east London primary care database  | Anxiety and depressive disorders were selected from the primary care database | Incident non-fatal myocardial infarction (MI) and stroke                                                 | 524,952 patients with mean age of 35.9 years, and 52.8% were male; followed up to 10 years |  | Anxiety was not associated with MI (HR 1.08, 95% CI 0.92–1.24) or stroke (HR 1.06, 95% CI 0.81–1.38).                                                                                                  | no | depression |

|                                 |                                                                                                                                                       |                                                                                                                                                       |                                                                                                                                                                                                                                                      |                                                                                                                                                                                     |                                                                                                                                                                                                                    |    |                                                                                                              |
|---------------------------------|-------------------------------------------------------------------------------------------------------------------------------------------------------|-------------------------------------------------------------------------------------------------------------------------------------------------------|------------------------------------------------------------------------------------------------------------------------------------------------------------------------------------------------------------------------------------------------------|-------------------------------------------------------------------------------------------------------------------------------------------------------------------------------------|--------------------------------------------------------------------------------------------------------------------------------------------------------------------------------------------------------------------|----|--------------------------------------------------------------------------------------------------------------|
| Pelletier R, 2015 <sup>18</sup> | DECADE (Depression Effects on Coronary Artery Disease Events), a prospective observational study of patients referred at the Montreal Heart Institute | Depression and anxiety disorders were assessed at baseline using the Primary Care Evaluation of Mental Disorders (PRIME-MD)                           | Major adverse cardiovascular events (MACE) including cardiac mortality, non-fatal myocardial infarction (MI), revascularization procedures, and cerebrovascular events (i.e., stroke), among patients with and without coronary artery disease (CAD) | 2390 patients with mean age of around 56 years, and 30-40% were female; followed for 8.8 years, between 1998 and 2009                                                               | Neither depression nor anxiety was associated with MACE among patients with or without CAD.                                                                                                                        | no | depression                                                                                                   |
| Chang WH, 2017 <sup>30</sup>    | A nationwide longitudinal cohort study including individuals aged over 60 years from the National Health Insurance Research Database (2000-2008)      | Coexisting geriatric anxiety and depressive disorders                                                                                                 | Ischemic heart disease mortality defined as in-hospital death or critical discharge (discharged with a terminal condition for death at home)                                                                                                         | 1086 elderly individuals with anxiety disorders (44.8% male, mean follow-up 6.5 years) and 50,554 elderly controls (57.2% male, mean follow-up 7.7 years) without anxiety disorders | The risk of mortality in patients with anxiety disorders was higher than controls, and was even higher when the patients had coexisting anxiety and depressive disorder (RR = 1.60; 95% CI: 1.14–2.24)             | no | no                                                                                                           |
| Tsai M-T, 2016 <sup>31</sup>    | An 11-year population-based retrospective cohort study used the National Health Insurance Research Database in Taiwan                                 | Comorbid anxiety in patients with diabetes defined by both a clinical diagnosis of the DSM-IV (ICD-9-CM) and prescriptions for anxiolytic medications | Stroke including an ischemic stroke event or a hemorrhagic stroke event                                                                                                                                                                              | 4124 patients with diabetes and 41% were male; followed up during 2001-2011                                                                                                         | Diabetic patients with comorbid anxiety were at a higher risk of stroke compared to patients without comorbid anxiety (HR: 1.33, 95% CI: 1.02–1.72).                                                               | no | psychiatric disorders (including depression, bipolar disorder, or schizophrenia) and psychiatric medications |
| Chen M-H, 2015 <sup>32</sup>    | A longitudinal study based on data from the Taiwan's National Health Insurance                                                                        | Post-traumatic stress disorder (PTSD) identified from the Taiwan National Health Insurance Research Database                                          | Diagnoses of any stroke, ischemic stroke and hemorrhagic stroke given by neurologists, neurosurgeons, and emergency room doctors                                                                                                                     | 5217 individuals with PTSD and 20,868 age- and gender-matched controls (mean age of 36.6 years and 20.9% were male); enrolled between 2002 and 2009, and followed up until 2011     | Individuals with PTSD had an increased risk of developing any stroke (HR=3.37, 95% CI 2.44–4.67) and ischemic stroke (HR = 3.47, 95% CI 2.23–5.39) after adjusting for demographic data and medical comorbidities. | no | major depression                                                                                             |

|                              |                                                                                                   |                                                                                                                                                   |                                                                                                                                                                                                                                                             |                                                                                                                                                                                                                    |                                                                                                                                                                                                                                                                                                                 |                    |                                                                                 |
|------------------------------|---------------------------------------------------------------------------------------------------|---------------------------------------------------------------------------------------------------------------------------------------------------|-------------------------------------------------------------------------------------------------------------------------------------------------------------------------------------------------------------------------------------------------------------|--------------------------------------------------------------------------------------------------------------------------------------------------------------------------------------------------------------------|-----------------------------------------------------------------------------------------------------------------------------------------------------------------------------------------------------------------------------------------------------------------------------------------------------------------|--------------------|---------------------------------------------------------------------------------|
| Lin C-E, 2019 <sup>33</sup>  | A nationwide cohort study in Taiwan based on The National Health Insurance (NHI) program          | Posttraumatic stress disorder (PTSD)                                                                                                              | Metabolic syndrome (MetS) including hypertension, dyslipidemia, and diabetes mellitus in inpatient or outpatient medical records with concomitant medication prescriptions                                                                                  | 953 individuals in the PTSD cohort and 3812 individuals in the control cohort (49% were male); followed up to 3 years                                                                                              | HR for developing any metabolic parameter of MetS was 4.451 (95% CI: 2.109–5.001) in relation to PTSD.                                                                                                                                                                                                          | no                 | depression                                                                      |
| Rosman L, 2019 <sup>34</sup> | A prospective cohort study of 1.1 million young adults through the Veterans Health Administration | Posttraumatic stress disorder (PTSD) obtained from a clinical diagnosis based on ICD codes (ICD-9 code 309.81)                                    | Incident atrial fibrillation (AF)                                                                                                                                                                                                                           | 988,090 young and middle-aged veterans (mean age, 30.29) and 87.8% were male; mean follow-up of 4.8 years                                                                                                          | PTSD was associated with incident AF in unadjusted models (HR, 1.31; 95% CI, 1.19–1.43) and models adjusted for demographics, lifestyle factors, cardiovascular risk factors, and depression (HR, 1.13; 95% CI, 1.02–1.24).                                                                                     | no                 | depression and substance abuse                                                  |
| Rosman L, 2019 <sup>35</sup> | A prospective cohort study of 1.1 million young adults through the Veterans Health Administration | Posttraumatic stress disorder (PTSD) obtained from a clinical diagnosis based on ICD codes (ICD-9 code 309.81)                                    | First onset of transient ischemic attack (TIA) and ischemic stroke                                                                                                                                                                                          | 987,855 young and middle-aged Veterans (mean age, 30.29) and 87.8% were male; up to 13 years of follow-up                                                                                                          | The association between PTSD and incident TIA (HR, 1.61; 95% CI, 1.27–2.04) and ischemic stroke (HR, 1.36; 95% CI, 1.22–1.52) remained significant in fully adjusted models. The effect of PTSD on ischemic stroke risk was stronger in men than in women.                                                      | no                 | major depressive disorder and generalized anxiety disorder, and substance abuse |
| Song H, 2019 <sup>36</sup>   | A population based, sibling controlled cohort study in Sweden                                     | Stress related disorders, including post-traumatic stress disorder (PTSD), acute stress reaction, adjustment disorder, and other stress reactions | Primary diagnosis of incident cardiovascular disease—any or specific subtypes (ischemic heart disease, cerebrovascular disease, emboli/ thrombosis, hypertensive diseases, heart failure, arrhythmia/conduction disorder, and fatal cardiovascular disease) | 136,637 patients (37% male), 171,314 unaffected full siblings (50% male) and 1,366,370 (37% male) matched population controls; median age of 36 years; followed up from 1987 to 2013 (median follow-up of 6 years) | In sibling-based comparisons, the hazard ratio for any cardiovascular disease was 1.64 (95% CI 1.45 to 1.84). Except for fatal cardiovascular diseases, these associations were not modified by the presence of psychiatric comorbidity. Analyses within the population matched cohort yielded similar results. | Yes, full siblings | other psychiatric comorbidities                                                 |

|                                       |                                                                                                                                               |                                                                                               |                                                                                                                                                                                                                                        |                                                                                                                                                  |                                                                                                                                                                                                                                                                                                                                                                                                                                     |                         |                                                                                        |
|---------------------------------------|-----------------------------------------------------------------------------------------------------------------------------------------------|-----------------------------------------------------------------------------------------------|----------------------------------------------------------------------------------------------------------------------------------------------------------------------------------------------------------------------------------------|--------------------------------------------------------------------------------------------------------------------------------------------------|-------------------------------------------------------------------------------------------------------------------------------------------------------------------------------------------------------------------------------------------------------------------------------------------------------------------------------------------------------------------------------------------------------------------------------------|-------------------------|----------------------------------------------------------------------------------------|
| Ebrahimi R, 2021 <sup>37</sup>        | Retrospective, longitudinal cohort study of the national Veterans Health Administration (VHA) electronic medical records among women Veterans | Posttraumatic stress disorder (PTSD), diagnosis codes from inpatient or outpatient encounters | Incident ischemic heart disease (IHD), defined as new-onset coronary artery disease, angina, or myocardial infarction                                                                                                                  | 398,769 female veterans; mean age of 40.1 years; median follow-up of 4.9 years                                                                   | PTSD was associated with greater risk of developing IHD (HR, 1.44; 95% CI, 1.38-1.50).                                                                                                                                                                                                                                                                                                                                              | no                      | anxiety, depression, schizophrenia, alcohol dependence, and nonalcohol drug dependence |
| Gradus JL, 2015 <sup>38</sup>         | Prospective cohort study utilizing Danish national registry data                                                                              | Post-traumatic stress disorder (PTSD) and adjustment disorder                                 | Cardiovascular disease (CVD) events including myocardial infarction (MI), stroke, ischemic stroke, and venous thromboembolism (VTE)                                                                                                    | PTSD (n=4724) and adjustment disorder (n=64,855) cohorts compared with the general population of Denmark from 1995 to 2011 (39% male)            | Associations were found between PTSD and all 4 CVD events ranging from 1.5 (95% CI 1.1 to 1.9) for MI to 2.1 (95% CI 1.7 to 2.7) for VTE. Associations that were similar in magnitude were also found for adjustment disorder and all 4 CVD events: 1.5 (95% CI 1.4 to 1.6) for MI to 1.9 (95% CI 1.8 to 2.0) for VTE.                                                                                                              | no                      | depression and alcohol abuse                                                           |
| Gomez-Caminer o A, 2005 <sup>39</sup> | A cohort study of a national managed care database in United States                                                                           | Panic disorder (PD) from database from 1997 through 2002                                      | Coronary heart disease (CHD) defined as presence of an acute myocardial infarction, unstable angina, or angina pectoris                                                                                                                | 39,920 PD patients (68% female) and an equal number of patients without PD (59% female); mean age of 36 years; average follow up of 1.5 years    | Patients with PD were observed to have nearly a 2-fold increased risk for CHD (HR=1.87, 95% CI=1.80 – 1.91). Patients with a comorbid diagnosis of depression were almost 3 times more likely to develop CHD (HR=2.60, 95% CI=2.30 – 3.01).                                                                                                                                                                                         | no                      | depression                                                                             |
| Isomura K, 2021 <sup>40</sup>         | A population-based, sibling-controlled cohort study in Sweden                                                                                 | Obsessive-compulsive disorder (OCD) diagnosed between 1973 and 2013                           | Cardiovascular disease (CVD) defined from the National Patient Register by the record of an inpatient or outpatient visit and additionally from VAL by diagnoses records in visits to primary care or from the Cause of Death Register | 33,561 OCD patients, 23,263 clusters of full siblings and 10 times matched population controls (56.7% women); average follow-up time of 27 years | OCD was associated with an increased risk of a broad range of CVD (HR for any CVD = 1.25 [95% CI, 1.22–1.29]). These associations were strongest for venous thrombo-embolism (HR = 1.48 [95% CI, 1.38–1.58]) and heart failure (HR = 1.37 [95% CI, 1.28–1.46]). When comparing OCD exposed individuals with their non-exposed full siblings, results were largely similar. Exclusion of several groups of psychiatric comorbidities | yes, sibling controlled | other psychiatric comorbidities                                                        |

|                                 |                                                                                                                                             |                                                                                                                                                                                 |                                                                                                                                   |                                                                                                                                                                                                                         |                                                                                                                                                                                                                                                                                                                                                                                                                                                                                                                                                                                                                                                                                                                                                                                                                                                                                                                                                                                                                                                                                                                                                                                                                |                 |                                                                |
|---------------------------------|---------------------------------------------------------------------------------------------------------------------------------------------|---------------------------------------------------------------------------------------------------------------------------------------------------------------------------------|-----------------------------------------------------------------------------------------------------------------------------------|-------------------------------------------------------------------------------------------------------------------------------------------------------------------------------------------------------------------------|----------------------------------------------------------------------------------------------------------------------------------------------------------------------------------------------------------------------------------------------------------------------------------------------------------------------------------------------------------------------------------------------------------------------------------------------------------------------------------------------------------------------------------------------------------------------------------------------------------------------------------------------------------------------------------------------------------------------------------------------------------------------------------------------------------------------------------------------------------------------------------------------------------------------------------------------------------------------------------------------------------------------------------------------------------------------------------------------------------------------------------------------------------------------------------------------------------------|-----------------|----------------------------------------------------------------|
| Chen MH, 2021 <sup>41</sup>     | A longitudinal matched cohort study in Taiwan                                                                                               | Diagnosis of OCD obtained from the Health Insurance Research Database with data collected between 2001-2010                                                                     | Ischemic and hemorrhagic stroke during follow-up (from enrollment to end of 2011) were identified from the insurance database.    | 28,064 adult patients with OCD and 28,064 age-, sex-, and comorbidity-matched controls were included in this study, with an average age of 37 years and female predominance (51.8%). Mean follow-up time was 6.5 years. | resulted in comparable results, albeit attenuated. Patients with OCD (hazard ratio [HR], 3.02 [95% CI, 1.91–4.77]), especially middle-aged (HR, 2.66 [95% CI, 1.34–5.29]) and elderly adults (HR, 3.46 [95% CI, 1.70–7.05]), had an elevated risk of developing ischemic stroke during the follow-up period compared with non-OCD controls. The incidence of CHD was more than double in twins with PTSD (22.6%) than those without PTSD (8.9%; p<0.001). The association remained robust after adjusting for lifestyle factors, other CHD risk factors and major depression (OR=2.2, 95% confidence interval, 1.2-4.1). Associations were only mildly attenuated within 117 twin pairs discordant for PTSD. The age-adjusted association between PTSD and incident CVD was significant (hazard ratio=1.41; 95% CI: 1.21–1.63). After adjustment for metabolic conditions, the association between PTSD and incident CVD was attenuated but remained significant (hazard ratio=1.23; 95% CI: 1.06–1.44). After additional adjustment for smoking, sleep disorder, substance use disorder, anxiety disorders, and depression, PTSD was not associated with incident CVD (hazard ratio=0.96; 95% CI: 0.81–1.15). | no              | schizophrenia, bipolar disorder, and major depressive disorder |
| Vaccarino V, 2014 <sup>42</sup> | A prospective study of middle-aged male twins from the Vietnam Era Twin Registry                                                            | Post-traumatic stress disorder (PTSD) diagnosis based on the Diagnostic Interview Schedule (DIS) for psychiatric disorders                                                      | Clinical events (myocardial infarction, other hospitalizations for coronary heart disease [CHD] and coronary revascularization)   | A total of 562 twins (281 pairs) were included with mean age of 42.6 yrs at baseline; all males; median follow-up of 13 years                                                                                           | The incidence of CHD was more than double in twins with PTSD (22.6%) than those without PTSD (8.9%; p<0.001). The association remained robust after adjusting for lifestyle factors, other CHD risk factors and major depression (OR=2.2, 95% confidence interval, 1.2-4.1). Associations were only mildly attenuated within 117 twin pairs discordant for PTSD. The age-adjusted association between PTSD and incident CVD was significant (hazard ratio=1.41; 95% CI: 1.21–1.63). After adjustment for metabolic conditions, the association between PTSD and incident CVD was attenuated but remained significant (hazard ratio=1.23; 95% CI: 1.06–1.44). After additional adjustment for smoking, sleep disorder, substance use disorder, anxiety disorders, and depression, PTSD was not associated with incident CVD (hazard ratio=0.96; 95% CI: 0.81–1.15).                                                                                                                                                                                                                                                                                                                                             | yes, twin pairs | major depression                                               |
| Scherrer JF, 2019 <sup>43</sup> | A longitudinal cohort study with eligible patients used 1 of 5 Veterans Health Affairs medical centers distributed across the United States | 2 separate visits with an ICD-9 code for PTSD (ICD-9: 309.81) within a 12-month period or 1 inpatient stay to classify patients as having post-traumatic stress disorder (PTSD) | Incident CVD was defined by ICD-9 codes and Current Procedural Terminology codes for cardiovascular revascularization procedures. | 2519 Veterans Health Affairs patients had PTSD diagnoses and 1659 did not; mean=50.1 years, SD±11.0, mostly male (87.0%); Patients could enter the cohort between 2008 and 2012 with follow-up until 2015.              | After adjustment for metabolic conditions, the association between PTSD and incident CVD was attenuated but remained significant (hazard ratio=1.23; 95% CI: 1.06–1.44). After additional adjustment for smoking, sleep disorder, substance use disorder, anxiety disorders, and depression, PTSD was not associated with incident CVD (hazard ratio=0.96; 95% CI: 0.81–1.15).                                                                                                                                                                                                                                                                                                                                                                                                                                                                                                                                                                                                                                                                                                                                                                                                                                 | no              | substance use disorder, anxiety disorders, and depression      |

---

## Eating disorder

---

|                             |                                                                                                                                    |                                                           |                                                                                                                                 |                                                                                                                                                                |                                                                                                                                                                                                                                                                                                                                                                                                                                                            |    |                                                                                              |
|-----------------------------|------------------------------------------------------------------------------------------------------------------------------------|-----------------------------------------------------------|---------------------------------------------------------------------------------------------------------------------------------|----------------------------------------------------------------------------------------------------------------------------------------------------------------|------------------------------------------------------------------------------------------------------------------------------------------------------------------------------------------------------------------------------------------------------------------------------------------------------------------------------------------------------------------------------------------------------------------------------------------------------------|----|----------------------------------------------------------------------------------------------|
| Tith RM, 2020 <sup>44</sup> | A longitudinal cohort study using the Maintenance and Use of Data for the Study of Hospital Clientele registry from Quebec, Canada | Hospitalization for bulimia nervosa between 2006 and 2016 | Incidence of cardiovascular disease from Hospital Clientele registry with discharge abstracts of all hospitalizations in Quebec | 416,709 women (including 818 women hospitalized for bulimia nervosa and 415,891 for pregnancy-related events); mean age of 28.3 years; followed up to 12 years | Women hospitalized for bulimia nervosa had 4.25 (95% CI, 2.98-6.07) times the risk of any cardiovascular disease and 4.72 (95% CI, 2.05-10.84) times the risk of death compared with women hospitalized for pregnancy-related events. Bulimia nervosa was found to be associated with ischemic heart disease (HR, 6.63; 95% CI, 3.34-13.13), atherosclerosis (HR, 6.94; 95% CI, 3.08-15.66), and cardiac conduction defects (HR, 2.99; 95% CI, 1.57-5.71). | no | depression, anxiety, bipolar disorder, schizophrenia, and alcohol, tobacco, or substance use |
|-----------------------------|------------------------------------------------------------------------------------------------------------------------------------|-----------------------------------------------------------|---------------------------------------------------------------------------------------------------------------------------------|----------------------------------------------------------------------------------------------------------------------------------------------------------------|------------------------------------------------------------------------------------------------------------------------------------------------------------------------------------------------------------------------------------------------------------------------------------------------------------------------------------------------------------------------------------------------------------------------------------------------------------|----|----------------------------------------------------------------------------------------------|

---

## Personality disorder

---

|                              |                                                                                              |                                                                           |                                                                                                                                                  |                                                                                                                                                              |                                                                                                                                                      |    |                                                                                             |
|------------------------------|----------------------------------------------------------------------------------------------|---------------------------------------------------------------------------|--------------------------------------------------------------------------------------------------------------------------------------------------|--------------------------------------------------------------------------------------------------------------------------------------------------------------|------------------------------------------------------------------------------------------------------------------------------------------------------|----|---------------------------------------------------------------------------------------------|
| Chen M-H, 2017 <sup>45</sup> | A nationwide longitudinal study using the Taiwan National Health Insurance Research Database | Borderline personality disorder (BPD) by board-certificated psychiatrists | Stroke diagnosis given by neurologists, neurosurgeons, internal medicine physicians, or emergency room physicians after brain image examinations | 5969 borderline patients and 23,876 age- and sex-matched controls; average age of 28.55 years; 69.7% female; followed up from between 2002 and 2009, to 2011 | BPD was associated with an increased risk of developing any stroke (HR: 4.82, 95% CI: 2.77–8.40) and ischemic stroke (HR: 5.67, 95% CI: 2.49–12.93). | no | major depression, PTSD, bipolar disorder, alcohol-related disorders, substance use disorder |
|------------------------------|----------------------------------------------------------------------------------------------|---------------------------------------------------------------------------|--------------------------------------------------------------------------------------------------------------------------------------------------|--------------------------------------------------------------------------------------------------------------------------------------------------------------|------------------------------------------------------------------------------------------------------------------------------------------------------|----|---------------------------------------------------------------------------------------------|

---

## Others/all types

---

|                             |                                                           |                                                                                                         |                                                                                                         |                                                                            |                                                                                                                                                                                               |    |                                       |
|-----------------------------|-----------------------------------------------------------|---------------------------------------------------------------------------------------------------------|---------------------------------------------------------------------------------------------------------|----------------------------------------------------------------------------|-----------------------------------------------------------------------------------------------------------------------------------------------------------------------------------------------|----|---------------------------------------|
| Gale CR, 2014 <sup>46</sup> | Cohort study including all non-adopted men born in Sweden | Mental disorders were assessed by psychiatric interview on conscription and data on hospital admissions | Coronary heart disease (CHD) obtained from the Cause of Death Register and the Swedish Patient Register | 1,107,524 men with average age of 18.3 years; mean follow-up of 22.6 years | Age-adjusted HR (95% CI) according to diagnoses at conscription ranged from 1.30 (1.05, 1.60) (depressive disorders) to 1.92 (1.60, 2.31) (alcohol-related disorders). The equivalent figures | no | risky use of alcohol and intelligence |
|-----------------------------|-----------------------------------------------------------|---------------------------------------------------------------------------------------------------------|---------------------------------------------------------------------------------------------------------|----------------------------------------------------------------------------|-----------------------------------------------------------------------------------------------------------------------------------------------------------------------------------------------|----|---------------------------------------|

|                            |                                                                                                                                          |                                                                                                                                                                       |                                                                                                              |                                                                                                                                                                         |                                                                                                                                                                                                                                                                                                                                                   |    |                     |
|----------------------------|------------------------------------------------------------------------------------------------------------------------------------------|-----------------------------------------------------------------------------------------------------------------------------------------------------------------------|--------------------------------------------------------------------------------------------------------------|-------------------------------------------------------------------------------------------------------------------------------------------------------------------------|---------------------------------------------------------------------------------------------------------------------------------------------------------------------------------------------------------------------------------------------------------------------------------------------------------------------------------------------------|----|---------------------|
| Sung C, 2022 <sup>47</sup> | A population-based retrospective matched cohort study based on the Taiwan National Health Insurance Research Database from 2000 to 2013. | Alcohol use disorder (AUD) defined as a newly diagnosis of AUD, namely alcoholic psychosis, alcohol abuse and alcohol dependency syndrome obtained from the database. | CVD was identified using the diagnostic codes for ischemic heart disease (IHD) and stroke from the database. | 7,420 patients with AUD and 29,680 age- and sex-matched controls without AUD. The patients were predominantly men (92.84%), with an average age of 43.12 ± 11.85 years. | according to diagnoses during hospital admission ranged from 1.49 (1.24, 1.80) (schizophrenia) to 2.82 (2.53, 3.13) (other substance use disorders).<br><br>The AUD group also exhibited a significantly higher incidence of CVD than the control group (adjusted hazard ratio [AHR] =1.447, 95% confidence interval [CI] =1.372–1.52 5,P<0.001). | no | anxiety, depression |
|----------------------------|------------------------------------------------------------------------------------------------------------------------------------------|-----------------------------------------------------------------------------------------------------------------------------------------------------------------------|--------------------------------------------------------------------------------------------------------------|-------------------------------------------------------------------------------------------------------------------------------------------------------------------------|---------------------------------------------------------------------------------------------------------------------------------------------------------------------------------------------------------------------------------------------------------------------------------------------------------------------------------------------------|----|---------------------|

- 
1. Søgaard M, Skjøth F, Kjældgaard JN, Larsen TB, Hjortshøj SP, Riahi S. Atrial fibrillation in patients with severe mental disorders and the risk of stroke, fatal thromboembolic events and bleeding: a nationwide cohort study. *BMJ Open*. 2017;7(12):e018209. doi:10.1136/bmjopen-2017-018209
  2. Foroughi M, Medina Inojosa JR, Lopez-Jimenez F, et al. Association of Bipolar Disorder With Major Adverse Cardiovascular Events: A Population-Based Historical Cohort Study. *Psychosom Med*. 2022;84(1):97-103. doi:10.1097/PSY.0000000000001017
  3. Wu SI, Chen SC, Liu SI, et al. Relative Risk of Acute Myocardial Infarction in People with Schizophrenia and Bipolar Disorder: A Population-Based Cohort Study. *PLoS One*. 2015;10(8):e0134763. doi:10.1371/journal.pone.0134763
  4. Davydow DS, Ribe AR, Pedersen HS, et al. Serious Mental Illness and Risk for Hospitalizations and Rehospitalizations for Ambulatory Care-sensitive Conditions in Denmark: A Nationwide Population-based Cohort Study. *Med Care*. 2016;54(1):90-97. doi:10.1097/MLR.0000000000000448
  5. Prieto ML, Schenck LA, Kruse JL, et al. Long-term risk of myocardial infarction and stroke in bipolar I disorder: A population-based Cohort Study. *J Affect Disord*. 2016;194:120-127. doi:10.1016/j.jad.2016.01.015
  6. Krieger I, Tzur Bitan D, Comaneshter D, Cohen A, Feingold D. Increased risk of smoking-related illnesses in schizophrenia patients: A nationwide cohort study. *Schizophr Res*. 2019;212:121-125. doi:10.1016/j.schres.2019.07.058
  7. Davydow DS, Levine DA, Zivin K, Katon WJ, Langa KM. The association of depression, cognitive impairment without dementia, and dementia with risk of ischemic stroke: a cohort study. *Psychosom Med*. 2015;77(2):200-208. doi:10.1097/PSY.0000000000000136
  8. Egeberg A, Khalid U, Gislason GH, Mallbris L, Skov L, Hansen PR. Association between depression and risk of atrial fibrillation and stroke in patients with psoriasis: a Danish nationwide cohort study. *Br J Dermatol*. 2015;173(2):471-479. doi:10.1111/bjd.13778



9. Fenger-Grøn M, Vestergaard M, Pedersen HS, et al. Depression, antidepressants, and the risk of non-valvular atrial fibrillation: A nationwide Danish matched cohort study. *Eur J Prev Cardiol.* 2019;26(2):187-195. doi:10.1177/2047487318811184
10. Huang CJ, Hsieh MH, Hou WH, Liu JC, Jeng C, Tsai PS. Depression, antidepressants, and the risk of coronary heart disease: a population-based cohort study. *Int J Cardiol.* 2013;168(5):4711-4716. doi:10.1016/j.ijcard.2013.07.173
11. Jee YH, Chang H, Jung KJ, Jee SH. Cohort study on the effects of depression on atherosclerotic cardiovascular disease risk in Korea. *BMJ Open.* 2019;9(6):e026913. doi:10.1136/bmjopen-2018-026913
12. Lee CWS, Liao CH, Lin CL, Liang JA, Sung FC, Kao CH. Depression and risk of venous thromboembolism: a population-based retrospective cohort study. *Psychosom Med.* 2015;77(5):591-598. doi:10.1097/PSY.000000000000193
13. Liu N, Pan XF, Yu C, et al. Association of Major Depression With Risk of Ischemic Heart Disease in a Mega-Cohort of Chinese Adults: The China Kadoorie Biobank Study. *J Am Heart Assoc.* 2016;5(12). doi:10.1161/JAHA.116.004687
14. Mathur R, Pérez-Pinar M, Foguet-Boreu Q, Ayis S, Ayerbe L. Risk of incident cardiovascular events amongst individuals with anxiety and depression: A prospective cohort study in the east London primary care database. *J Affect Disord.* 2016;206:41-47. doi:10.1016/j.jad.2016.07.046
15. O'Neil A, Fisher AJ, Kibbey KJ, et al. Depression is a risk factor for incident coronary heart disease in women: An 18-year longitudinal study. *J Affect Disord.* 2016;196:117-124. doi:10.1016/j.jad.2016.02.029
16. Parkin L, Balkwill A, Sweetland S, Reeves GK, Green J, Beral V. Antidepressants, Depression, and Venous Thromboembolism Risk: Large Prospective Study of UK Women. *J Am Heart Assoc.* 2017;6(5). doi:10.1161/JAHA.116.005316
17. Patten SB, Williams JVA, Lavorato DH, Modgill G, Jetté N, Eliasziw M. Major depression as a risk factor for chronic disease incidence: longitudinal analyses in a general population cohort. *Gen Hosp Psychiatry.* 2008;30(5):407-413. doi:10.1016/j.genhosppsych.2008.05.001
18. Pelletier R, Bacon SL, Arsenault A, et al. Relative associations between depression and anxiety on adverse cardiovascular events: does a history of coronary artery disease matter? A prospective observational study. *BMJ Open.* 2015;5(12):e006582. doi:10.1136/bmjopen-2014-006582
19. Ting RZW, Lau ESH, Ozaki R, et al. High risk for cardiovascular disease in Chinese type 2 diabetic patients with major depression--a 7-year prospective analysis of the Hong Kong Diabetes Registry. *J Affect Disord.* 2013;149(1-3):129-135. doi:10.1016/j.jad.2013.01.012
20. Tsai TY, Lu MC, Livneh H, Chiu SY, Lai NS, Guo HR. Does depression increase the risk of stroke in patients with rheumatoid arthritis? A population-based cohort study. *BMJ Open.* 2017;7(4):e014233. doi:10.1136/bmjopen-2016-014233

21. White JR, Chang CCH, So-Armah KA, et al. Depression and human immunodeficiency virus infection are risk factors for incident heart failure among veterans: Veterans Aging Cohort Study. *Circulation*. 2015;132(17):1630-1638. doi:10.1161/CIRCULATIONAHA.114.014443
22. Yuan HW, Wang CX, Zhang N, et al. Poststroke depression and risk of recurrent stroke at 1 year in a Chinese cohort study. *PLoS One*. 2012;7(10):e46906. doi:10.1371/journal.pone.0046906
23. Zivin K, Yosef M, Miller EM, et al. Associations between depression and all-cause and cause-specific risk of death: a retrospective cohort study in the Veterans Health Administration. *J Psychosom Res*. 2015;78(4):324-331. doi:10.1016/j.jpsychores.2015.01.014
24. Pratt LA, Ford DE, Crum RM, Armenian HK, Gallo JJ, Eaton WW. Depression, psychotropic medication, and risk of myocardial infarction. Prospective data from the Baltimore ECA follow-up. *Circulation*. 1996;94(12):3123-3129. doi:10.1161/01.cir.94.12.3123
25. Khambaty T, Stewart JC, Gupta SK, et al. Association Between Depressive Disorders and Incident Acute Myocardial Infarction in Human Immunodeficiency Virus-Infected Adults: Veterans Aging Cohort Study. *JAMA Cardiol*. 2016;1(8):929-937. doi:10.1001/jamacardio.2016.2716
26. Sun J, Ma H, Yu C, et al. Association of Major Depressive Episodes With Stroke Risk in a Prospective Study of 0.5 Million Chinese Adults. *Stroke*. 2016;47(9):2203-2208. doi:10.1161/STROKEAHA.116.013512
27. Almas A, Moller J, Iqbal R, Lundin A, Forsell Y. Does depressed persons with non-cardiovascular morbidity have a higher risk of CVD? A population-based cohort study in Sweden. *BMC Cardiovasc Disord*. 2019;19(1):260. doi:10.1186/s12872-019-1252-7
28. Prigge R, Wild SH, Jackson CA. The individual and combined associations of depression and socioeconomic status with risk of major cardiovascular events: A prospective cohort study. *J Psychosom Res*. 2022;160:110978. doi:10.1016/j.jpsychores.2022.110978
29. Jackson CA, Pathirana T, Gardiner PA. Depression, anxiety and risk of hypertension in mid-aged women: a prospective longitudinal study. *J Hypertens*. 2016;34(10):1959-1966. doi:10.1097/HJH.0000000000001030
30. Chang WH, Lee IH, Chen WT, Chen PS, Yang YK, Chen KC. Coexisting geriatric anxiety and depressive disorders may increase the risk of ischemic heart disease mortality-a nationwide longitudinal cohort study. *Int J Geriatr Psychiatry*. 2017;32(12):e25-e33. doi:10.1002/gps.4646
31. Tsai MT, Erickson SR, Cohen LJ, Wu CH. The association between comorbid anxiety disorders and the risk of stroke among patients with diabetes: An 11-year population-based retrospective cohort study. *J Affect Disord*. 2016;202:178-186. doi:10.1016/j.jad.2016.03.060
32. Chen MH, Pan TL, Li CT, et al. Risk of stroke among patients with post-traumatic stress disorder: nationwide longitudinal study. *Br J Psychiatry*. 2015;206(4):302-307. doi:10.1192/bjp.bp.113.143610

33. Lin CE, Chung CH, Chen LF, You CH, Chien WC, Chou PH. Risk of incident hypertension, diabetes, and dyslipidemia after first posttraumatic stress disorder diagnosis: A nationwide cohort study in Taiwan. *Gen Hosp Psychiatry*. 2019;58:59-66. doi:10.1016/j.genhosppsy.2019.03.004
34. Rosman L, Lampert R, Ramsey CM, et al. Posttraumatic Stress Disorder and Risk for Early Incident Atrial Fibrillation: A Prospective Cohort Study of 1.1 Million Young Adults. *J Am Heart Assoc*. 2019;8(19):e013741. doi:10.1161/JAHA.119.013741
35. Rosman L, Sico JJ, Lampert R, et al. Posttraumatic Stress Disorder and Risk for Stroke in Young and Middle-Aged Adults: A. *Stroke*. 2019;50(11):2996-3003. doi:10.1161/STROKEAHA.119.026854
36. Song H, Fang F, Arnberg FK, et al. Stress related disorders and risk of cardiovascular disease: population based, sibling controlled cohort study. *BMJ*. 2019;365. doi:10.1136/bmj.11255
37. Ebrahimi R, Lynch KE, Beckham JC, et al. Association of Posttraumatic Stress Disorder and Incident Ischemic Heart Disease in Women Veterans. *JAMA Cardiol*. 2021;6(6):642-651. doi:10.1001/jamacardio.2021.0227
38. Gradus JL, Farkas DK, Svensson E, et al. Associations between stress disorders and cardiovascular disease events in the Danish population. *BMJ open*. 2015;5(12):e009334. doi:10.1136/bmjopen-2015-009334
39. Gomez-Caminero A, Blumentals WA, Russo LJ, Brown RR, Castilla-Puentes R. Does panic disorder increase the risk of coronary heart disease? A cohort study of a national managed care database. *Psychosom Med*. 2005;67(5):688-691. doi:10.1097/01.psy.0000174169.14227.1f
40. Isomura K, Sidorchuk A, Brander G, et al. Risk of specific cardiovascular diseases in obsessive-compulsive disorder. *Journal of Psychiatric Research*. 2021;135:189-196. doi:10.1016/j.jpsychires.2020.12.066
41. Chen MH, Tsai SJ, Su TP, et al. Increased Risk of Stroke in Patients With Obsessive-Compulsive Disorder: A Nationwide Longitudinal Study. *Stroke*. 2021;52(8):2601-2608. doi:10.1161/STROKEAHA.120.032995
42. Vaccarino V, Goldberg J, Rooks C, et al. Posttraumatic Stress Disorder and Incidence of Coronary Heart Disease: A Twin Study. *J Am Coll Cardiol*. 2013;62(11):10.1016/j.jacc.2013.04.085. doi:10.1016/j.jacc.2013.04.085
43. Scherrer JF, Salas J, Cohen BE, et al. Comorbid Conditions Explain the Association Between Posttraumatic Stress Disorder and Incident Cardiovascular Disease. *Journal of the American Heart Association*. 2019;8(4):e011133. doi:10.1161/JAHA.118.011133
44. Tith RM, Paradis G, Potter BJ, et al. Association of Bulimia Nervosa With Long-term Risk of Cardiovascular Disease and Mortality Among Women. *JAMA psychiatry*. 2020;77(1):44-51. doi:10.1001/jamapsychiatry.2019.2914

45. Chen MH, Hsu JW, Bai YM, et al. Risk of stroke among patients with borderline personality disorder: A nationwide longitudinal study. *J Affect Disord.* 2017;219:80-85. doi:10.1016/j.jad.2017.05.005
46. Gale CR, Batty GD, Osborn DPJ, Tynelius P, Rasmussen F. Mental disorders across the adult life course and future coronary heart disease: evidence for general susceptibility. *Circulation.* 2014;129(2):186-193. doi:10.1161/CIRCULATIONAHA.113.002065
47. Sung C, Chung CH, Lin FH, et al. Risk of cardiovascular disease in patients with alcohol use disorder: A population-based retrospective cohort study. *PLoS One.* 2022;17(10):e0276690. doi:10.1371/journal.pone.0276690

**Table S2. International Classification of Diseases (ICD) codes for exposure, outcome, and covariates**

|                                                 | ICD-9                                       | ICD-10                                       |
|-------------------------------------------------|---------------------------------------------|----------------------------------------------|
| <b>Any psychiatric disorder</b>                 | 291,292, 295-311, 314, 317-319              | F10-F69, F70-F73, F78, F79, F84, F90         |
| Non-affective psychotic disorders               | 295, 297, 298, excluding 295H and 298B      | F20-24, F28-29                               |
| - Schizophrenia                                 | 295A-295E, 295G, 295W, 295X                 | F200-F206, F208, F209                        |
| Affective psychotic disorders                   | 296, 295H, 298B                             | F25, F30-31, F32.3, F33.3                    |
| - Schizoaffective disorder                      | 295H                                        | F25                                          |
| - Bipolar disorder                              | 296A-296H, 296W, 296X                       | F30-F31                                      |
| Substance misuse                                | 291, 292, 303, 304                          | F10-16, F18-19                               |
| - Alcohol                                       | 303A, 303X                                  | F100-F109                                    |
| - Drug                                          | 304A-304H, 304W, 304X                       | F110-F119, F190-F199                         |
| Non-psychotic mood disorders                    | 300E, 311                                   | F32-34, F38-39, excluding F32.3 and F33.3    |
| Anxiety and stress-related disorders            | 300A-D, 300F-H, 300W-X, 306, 307A, 308, 309 | F40-48                                       |
| - Anxiety disorder                              | 300A, 300C                                  | F400-F402, F408, F409, F410-F413, F418, F419 |
| - Obsessive-compulsive disorder                 | 300D                                        | F420-422, F428, F429                         |
| - Post-traumatic stress disorder                | 308A-308E, 308X, 309A-309E, 309W, 309X      | F430-F432, F438, F439                        |
| Eating disorders                                | 307B, 307F                                  | F500, F501, F502, F503, F509                 |
| - Anorexia nervosa                              | 307B                                        | F500, F501                                   |
| - Bulimia nervosa                               | -                                           | F502, F503                                   |
| Personality disorders                           | 301                                         | F60-63, F68-69                               |
| Attention deficit hyperactivity disorder (ADHD) | 314, 314A-314C, 314J, 314W, 314X            | F90, F900, F901, F908                        |
| Autism spectrum disorder (ASD)                  | 299A                                        | F840, F841, F845                             |

|                                                         |                                                    |                                                                                                                                                      |
|---------------------------------------------------------|----------------------------------------------------|------------------------------------------------------------------------------------------------------------------------------------------------------|
| Intellectual disability                                 | 317, 318, 318A, 318B, 318C, 319                    | F70-F73, F78, F79                                                                                                                                    |
| <b>Any cardiovascular disease</b>                       | 390-438, 440,444,445                               | I00-I70, I730, I74- I75                                                                                                                              |
| Ischemic heart disease                                  | 410-414                                            | I20-I24, I25 (excluding I25.5)                                                                                                                       |
| Cerebrovascular disease                                 | 430-434, 436-438                                   | I60-I69                                                                                                                                              |
| Emboli and thrombosis                                   | 415, 444,445                                       | I26, I74, I75                                                                                                                                        |
| Hypertensive disease                                    | 401-405                                            | I10-I16, I674                                                                                                                                        |
| Heart failure                                           | 428                                                | I25.5, I42.0, I42.8, I42.9, I50                                                                                                                      |
| Arrhythmia/conduction disorder                          | 426, 427                                           | I44-I49                                                                                                                                              |
| <b>Covariates: history of severe somatic conditions</b> |                                                    |                                                                                                                                                      |
| Chronic pulmonary disease                               | 500-505, 506C                                      | J60-J67, J684, J70, J703                                                                                                                             |
| Connective tissue disease                               | 710A, 710B, 710E, 714A, 714B, 714C, 714W,714X, 725 | M05, M06, M315, M32-M34, M351, M353, M360                                                                                                            |
| Diabetes                                                | 250A, 250G                                         | E100, E101, E106, E108, E109, E110, E111, E116, E118, E119, E120, E121, E126, E128, E129, E130, E131, E136, E138, E139, E140, E141, E146, E148, E149 |
| Diabetes with end organ damage                          | 250D-250F                                          | E102-E105, E107, E112-E115, E117, E122-E125, E127, E132-E135, E137, E142-E145, E147                                                                  |
| Moderate or severe renal disease                        | 582, 583A, 583B, 583C, 583E,                       | I120, I131, N032-N037, N052-N057, N18, N19, N250, Z490-Z492, Z940, Z992                                                                              |
| Mild liver disease                                      | 583G, 583H, 585, 586, 588                          | B18, K700-K703, K709, K713-K715, K717, K73, K74, K760, K762--K764, K768, K769, Z944                                                                  |
| Moderate or severe liver disease                        | 571C, 571E,571F, 571G                              | I850, I859, I864, I982, K704, K711, K721, K729, K765, K766, K767                                                                                     |
| Ulcer disease                                           | 572C, 572D, 572E, 572W, 456A, 456B, 456C           | K25-K28                                                                                                                                              |

|                                                 |                           |                                                                         |
|-------------------------------------------------|---------------------------|-------------------------------------------------------------------------|
| Any malignancy, including leukemia and lymphoma | 140-172, 174-195, 200-208 | C00-C26, C30-C34, C37-C41, C43, C45-C58, C60-C76, C81-C85, C88, C90-C97 |
| Metastatic cancer                               | 196,197,198,199A, 199B    | C77- C80                                                                |
| HIV/AIDS                                        | 042, 043, 044             | B20-B22, B24                                                            |

**Table S3. Number and median age at the index date among patients with psychiatric disorders in the sibling as well as population comparisons of the Swedish cohort**

| Characteristics                                    | Sibling comparison           |                                         | Population comparison        |                                         |
|----------------------------------------------------|------------------------------|-----------------------------------------|------------------------------|-----------------------------------------|
|                                                    | Exposed patients (N=619,289) | Median age at index date in years (IQR) | Exposed patients (N=900,240) | Median age at index date in years (IQR) |
| Type of first-onset psychiatric disorder           |                              |                                         |                              |                                         |
| 1. Non-affective psychotic disorders               | 16,765 (2,71)                | 33 (25-45)                              | 24,023 (2,67)                | 35 (25-48)                              |
| 1.1 Schizophrenia                                  | 2,602 (0,42)                 | 32 (25-44)                              | 3,782 (0,42)                 | 34 (25-47)                              |
| 2. Affective psychotic disorders                   | 14,449 (2,33)                | 37 (26-49)                              | 21,421 (2,38)                | 39 (27-51)                              |
| 2.1 Schizoaffective disorder                       | 311 (0,05)                   | 35 (23-46)                              | 452 (0,05)                   | 35 (24-47)                              |
| 2.2 Bipolar disorder                               | 7,347 (1,19)                 | 35 (25-48)                              | 11,074 (1,23)                | 36 (25-50)                              |
| 3. Substance misuse                                | 107,464 (17,35)              | 28 (19-46)                              | 161,192 (17,91)              | 30 (20-48)                              |
| 3.1 Alcohol misuse                                 | 79,884 (12,90)               | 31 (19-49)                              | 117,995 (13,11)              | 35 (19-51)                              |
| 3.2 Drug misuse                                    | 14,536 (2,35)                | 26 (21-35)                              | 22,893 (2,54)                | 26 (21-35)                              |
| 4. Non-psychotic mood disorders                    | 121,439 (19,61)              | 31 (21-45)                              | 176,450 (19,60)              | 33 (21-47)                              |
| 5. Anxiety and stress related disorders            | 200,143 (32,32)              | 31 (21-44)                              | 291,644 (32,40)              | 32 (21-45)                              |
| 5.1 Anxiety disorder                               | 98,503 (15,91)               | 28 (20-41)                              | 144,689 (16,07)              | 29 (20-43)                              |
| 5.2 Obsessive-compulsive disorder (OCD)            | 9,618 (1,55)                 | 22 (16-31)                              | 13,081 (1,45)                | 22 (16-32)                              |
| 5.3 Post-traumatic stress disorder (PTSD)          | 68,633 (11,08)               | 35 (24-46)                              | 100,578 (11,17)              | 35 (24-46)                              |
| 6. Eating disorders                                | 20,136 (3,25)                | 17 (15-22)                              | 25,665 (2,85)                | 17 (15-22)                              |
| 6.1 Anorexia nervosa                               | 8,014 (1,29)                 | 17 (15-20)                              | 9,853 (1,09)                 | 17 (15-20)                              |
| 6.2 Bulimia nervosa                                | 2,071 (0,33)                 | 23 (19-27)                              | 2,745 (0,30)                 | 23 (19-28)                              |
| 7. Personality disorders                           | 9,049 (1,46)                 | 28 (21-39)                              | 13,575 (1,51)                | 28 (21-39)                              |
| 8. Attention deficit hyperactivity disorder (ADHD) | 54,706 (8,83)                | 13 (10-18)                              | 79,039 (8,78)                | 13 (10-18)                              |
| 9. Autism spectrum disorder (ASD)                  | 18,762 (3,03)                | 12 (7-17)                               | 26,186 (2,91)                | 12 (6-18)                               |
| 10. Intellectual disability                        | 13,432 (2,17)                | 13 (8-20)                               | 19,018 (2,11)                | 13 (7-21)                               |
| 11. Others                                         | 42,944 (6,93)                | 26 (16-42)                              | 62,027 (6,89)                | 27 (16-43)                              |

IQR: interquartile range;



**Table S4. Characteristics of patients with psychiatric disorders, their unaffected siblings, and matched reference population - a Danish register-based replication cohort**

| Characteristics                                                           | Sibling comparison              |                                            | Population comparison           |                                                  |
|---------------------------------------------------------------------------|---------------------------------|--------------------------------------------|---------------------------------|--------------------------------------------------|
|                                                                           | Exposed patients<br>(N=404,023) | Unaffected full<br>siblings<br>(N=625,710) | Exposed patients<br>(N=875,634) | Matched reference<br>population<br>(N=8,756,340) |
| Median age at index date in years (IQR)                                   | 22.32 (18.10)                   | 22.99 (19.89)                              | 28.85 (23.73)                   | 28.85 (23.75)                                    |
| Median follow-up time in years (IQR)                                      | 9.72 (12.69)                    | 10.76 (13.65)                              | 9.72 (13.72)                    | 10.46 (14.78)                                    |
| Female sex                                                                | 196,869 (48.73)                 | 303,800 (48.55)                            | 433,576 (49.52)                 | 4,335,760 (49.52)                                |
| History of somatic diseases*                                              | 92,329 (22.85)                  | 103,294 (16.51)                            | 280,416 (32.02)                 | 1,748,782 (19.97)                                |
| Family history of cardiovascular disease†                                 | 190,085 (47.05)                 | -                                          | 281,744 (32.18)                 | 2,209,335 (25.23)                                |
| Type of psychiatric disorders                                             |                                 |                                            |                                 |                                                  |
| 1. Psychiatric and behavioral disorders due to psychoactive substance use | 147,096 (35.79)                 | -                                          | 353,391 (40.36)                 | -                                                |
| 2. Schizophrenia and related disorders                                    | 42,295 (10.29)                  | -                                          | 104,594 (11.94)                 | -                                                |
| 3. Mood disorders                                                         | 104,209 (25.36)                 | -                                          | 246,749 (28.18)                 | -                                                |
| 4. Anxiety disorders                                                      | 177,850 (43.28)                 | -                                          | 369,703 (42.22)                 | -                                                |
| 5. Eating disorders                                                       | 19,244 (4.68)                   | -                                          | 29,567 (3.38)                   | -                                                |
| 6. Personality disorders                                                  | 55,028 (13.39)                  | -                                          | 131,973 (15.07)                 | -                                                |
| 7. Intellectual disabilities                                              | 18,973 (4.62)                   | -                                          | 34,311 (3.92)                   | -                                                |
| 8. Developmental disorders                                                | 36,538 (8.89)                   | -                                          | 56,620 (6.47)                   | -                                                |
| 9. Behavioral and emotional disorders                                     | 72,974 (17.76)                  | -                                          | 118,894 (13.58)                 | -                                                |
| Number of psychiatric diagnoses                                           |                                 |                                            |                                 |                                                  |
| One                                                                       | 248,363 (60.44)                 | -                                          | 519,117 (59.28)                 | -                                                |
| Two                                                                       | 95,464 (23.23)                  | -                                          | 211,866 (24.20)                 | -                                                |
| Three or more                                                             | 67,126 (16.33)                  | -                                          | 144,651 (16.52)                 | -                                                |

IQR: interquartile range.

\* History of somatic diseases included chronic pulmonary disease, connective tissue disease, diabetes, renal diseases, liver diseases, ulcer diseases, and HIV infection/AIDS diagnosed before index date.

† The difference between exposed patients and unaffected full siblings was due to different number of siblings per exposed patient. The family history of cardiovascular disease was constant within each family.

**Table S5. Crude incidence rates (IRs) and hazard ratios (HRs) with 95% confidence intervals (CIs) for incident cardiovascular disease among patients with any psychiatric disorder, compared with their unaffected full siblings or matched reference population, by patient characteristics\***

|                                         | Sibling comparison       |                             |               |                             |                  | Population comparison |                             |               |                             |                  |
|-----------------------------------------|--------------------------|-----------------------------|---------------|-----------------------------|------------------|-----------------------|-----------------------------|---------------|-----------------------------|------------------|
|                                         | Unaffected full siblings |                             | Exposed group |                             |                  | Matched population    |                             | Exposed group |                             |                  |
|                                         | No. of cases             | IR (per 1,000 person years) | No. of cases  | IR (per 1,000 person years) | HR (95% CI)*     | No. of cases          | IR (per 1,000 person years) | No. of cases  | IR (per 1,000 person years) | HR (95% CI)*     |
| <b>Overall</b>                          | 65774                    | 7,38                        | 33893         | 8,61                        | 1.40 (1.38-1.43) | 550007                | 7,06                        | 54189         | 9,71                        | 1.45 (1.44-1.46) |
| <b>By sex</b>                           |                          |                             |               |                             |                  |                       |                             |               |                             |                  |
| male                                    | 38345                    | 8,51                        | 19719         | 10,23                       | 1.41 (1.37-1.45) | 315085                | 8,28                        | 31132         | 11,39                       | 1.47 (1.46-1.49) |
| female                                  | 27429                    | 6,22                        | 14174         | 7,06                        | 1.37 (1.33-1.42) | 234922                | 5,90                        | 23057         | 8,10                        | 1.42 (1.40-1.44) |
| <b>By age at cohort entry</b>           |                          |                             |               |                             |                  |                       |                             |               |                             |                  |
| ≤22                                     | 3991                     | 1,42                        | 2908          | 1,98                        | 1.28 (1.20-1.36) | 40498                 | 1,54                        | 4016          | 2,02                        | 1.42 (1.38-1.47) |
| 23-41                                   | 15003                    | 4,41                        | 8102          | 5,68                        | 1.48 (1.42-1.54) | 135089                | 4,27                        | 13633         | 6,29                        | 1.58 (1.56-1.61) |
| ≥42                                     | 46780                    | 17,36                       | 22883         | 21,96                       | 1.36 (1.34-1.39) | 374420                | 18,87                       | 36540         | 25,73                       | 1.41 (1.39-1.42) |
| <b>By age during follow-up</b>          |                          |                             |               |                             |                  |                       |                             |               |                             |                  |
| <35                                     | 5421                     | 2,03                        | 4140          | 2,88                        | 1.27 (1.20-1.35) | 49651                 | 2,06                        | 5856          | 2,97                        | 1.31 (1.27-1.35) |
| ≥35                                     | 60353                    | 9,66                        | 29753         | 11,91                       | 1.40 (1.37-1.42) | 500356                | 9,30                        | 48333         | 13,39                       | 1.44 (1.42-1.45) |
| <b>By calendar year at cohort entry</b> |                          |                             |               |                             |                  |                       |                             |               |                             |                  |
| 1987-1996                               | 23864                    | 8,69                        | 10033         | 9,94                        | 1.42 (1.38-1.47) | 184370                | 8,54                        | 15591         | 10,98                       | 1.48 (1.46-1.51) |
| 1997-2006                               | 27537                    | 7,51                        | 14434         | 8,76                        | 1.37 (1.34-1.40) | 227197                | 7,07                        | 22614         | 9,80                        | 1.41 (1.39-1.43) |
| 2007-2016                               | 14373                    | 5,73                        | 9426          | 7,36                        | 1.42 (1.38-1.47) | 138440                | 5,73                        | 15984         | 8,63                        | 1.46 (1.44-1.49) |
| <b>By history of somatic diseases</b>   |                          |                             |               |                             |                  |                       |                             |               |                             |                  |
| No                                      | 61574                    | 7,08                        | 30664         | 8,09                        | 1.41 (1.38-1.43) | 513934                | 6,75                        | 48455         | 9,04                        | 1.46 (1.45-1.48) |
| Yes                                     | 4200                     | 19,21                       | 3229          | 21,98                       | 1.60 (1.38-1.87) | 36073                 | 21,10                       | 5734          | 25,87                       | 1.25 (1.18-1.32) |

| <b>By family history of cardiovascular disease among first degree relatives</b> |       |       |       |       |                  |        |       |       |       |                  |
|---------------------------------------------------------------------------------|-------|-------|-------|-------|------------------|--------|-------|-------|-------|------------------|
| No                                                                              | 19861 | 3,66  | 11284 | 4,45  | 1.44 (1.40-1.49) | 201350 | 3,96  | 19417 | 5,44  | 1.48 (1.45-1.51) |
| Yes                                                                             | 45913 | 13,16 | 22609 | 16,12 | 1.38 (1.35-1.41) | 348657 | 12,89 | 34772 | 17,31 | 1.41 (1.39-1.42) |

\*Cox regression models, stratified by family identifiers in sibling comparison and matching identifiers (birth year and sex) in population comparison, adjusting for sex, birth year, educational level, individualized family income, cohabitation status, history of somatic disease and family history of cardiovascular disease. Time since index date was used as underlying time scale.

**Table S6. Crude incidence rates (IRs) and hazard ratios (HRs) with 95% confidence intervals (CIs) for incident cardiovascular disease among patients with any psychiatric disorder, compared to their unaffected full siblings (sibling comparison) or matched reference population (population comparison), by time since psychiatric diagnosis (<1 or ≥1 year)**

|                                                                                                                               | Sibling comparison |                             |                  | Population comparison |                             |                  |
|-------------------------------------------------------------------------------------------------------------------------------|--------------------|-----------------------------|------------------|-----------------------|-----------------------------|------------------|
|                                                                                                                               | No. of cases       | IR (per 1,000 person years) | HR (95% CI)*     | No. of cases          | IR (per 1,000 person years) | HR (95% CI)*     |
| <b>&lt;1 year follow-up</b>                                                                                                   |                    |                             |                  |                       |                             |                  |
| Full siblings/matched population controls                                                                                     | 4,396              | 4,58                        | 1.0              | 39,850                | 4,62                        | 1.0              |
| Psychiatric patients_ controlled for sex, birth year, educational level, individualized family income and cohabitation status | 4,214              | 7,77                        | 1.91 (1.82-2.00) | 7,224                 | 9,19                        | 1.96 (1.91-2.01) |
| As above + history of somatic diseases                                                                                        |                    |                             | 1.88 (1.79-1.98) |                       |                             | 1.91 (1.86-1.96) |
| As above + family history of cardiovascular disease                                                                           |                    |                             | -                |                       |                             | 1.91 (1.86-1.96) |
| <b>≥1 year follow-up</b>                                                                                                      |                    |                             |                  |                       |                             |                  |
| Full siblings/matched population controls                                                                                     | 63,468             | 7,95                        | 1.0              | 528,869               | 7,62                        | 1.0              |
| Psychiatric patients_ controlled for sex, birth year, educational level, individualized family income and cohabitation status | 34,910             | 9,14                        | 1.38 (1.35-1.40) | 55,525                | 10,26                       | 1.43 (1.42-1.44) |
| As above + history of somatic diseases                                                                                        |                    |                             | 1.37 (1.34-1.39) |                       |                             | 1.41 (1.40-1.43) |
| As above + family history of cardiovascular disease                                                                           |                    |                             | -                |                       |                             | 1.41 (1.40-1.43) |

\*Cox regression models, stratified by family identifiers in sibling comparison or matching identifiers (birth year and sex) in population comparison. Time since index date was used as underlying time scale.

**Table S7. Crude incidence rates (IRs) for different types of incident cardiovascular disease among patients with any psychiatric disorder, their unaffected full siblings and matched reference population, by time since psychiatric diagnosis (<1 or ≥1 year)**

|                                | Sibling comparison  |                            |               |                            | Population comparison |                            |               |                            |
|--------------------------------|---------------------|----------------------------|---------------|----------------------------|-----------------------|----------------------------|---------------|----------------------------|
|                                | Unaffected siblings |                            | Exposed group |                            | Matched population    |                            | Exposed group |                            |
|                                | No. of cases        | IR (per 1000 person years) | No. of cases  | IR (per 1000 person years) | No. of cases          | IR (per 1000 person years) | No. of cases  | IR (per 1000 person years) |
| <b>&lt;1 year follow up</b>    |                     |                            |               |                            |                       |                            |               |                            |
| Ischemic heart disease         | 930                 | 0,97                       | 656           | 1,21                       | 8457                  | 0,98                       | 1157          | 1,47                       |
| Cerebrovascular disease        | 598                 | 0,62                       | 712           | 1,31                       | 5893                  | 0,68                       | 1240          | 1,58                       |
| Emboli and thrombosis          | 229                 | 0,24                       | 262           | 0,48                       | 1865                  | 0,22                       | 476           | 0,61                       |
| Hypertensive disease           | 850                 | 0,89                       | 772           | 1,42                       | 7468                  | 0,87                       | 1364          | 1,74                       |
| Heart failure                  | 146                 | 0,15                       | 205           | 0,38                       | 1219                  | 0,14                       | 348           | 0,44                       |
| Arrhythmia/conduction disorder | 1105                | 1,15                       | 1105          | 2,04                       | 9764                  | 1,13                       | 1807          | 2,30                       |
| Fatal cardiovascular event     | 43                  | 0,04                       | 89            | 0,16                       | 488                   | 0,06                       | 174           | 0,22                       |
|                                |                     |                            |               |                            |                       |                            |               |                            |
| <b>≥1 year follow up</b>       |                     |                            |               |                            |                       |                            |               |                            |
| Ischemic heart disease         | 15099               | 1,89                       | 7544          | 1,97                       | 116950                | 1,69                       | 12058         | 2,23                       |
| Cerebrovascular disease        | 8778                | 1,10                       | 5604          | 1,47                       | 80052                 | 1,15                       | 9262          | 1,71                       |
| Emboli and thrombosis          | 3366                | 0,42                       | 2080          | 0,54                       | 26806                 | 0,39                       | 3307          | 0,61                       |
| Hypertensive disease           | 12094               | 1,52                       | 5917          | 1,55                       | 100567                | 1,45                       | 9139          | 1,69                       |
| Heart failure                  | 2224                | 0,28                       | 1683          | 0,44                       | 18887                 | 0,27                       | 2867          | 0,53                       |
| Arrhythmia/conduction disorder | 15059               | 1,89                       | 7893          | 2,07                       | 127084                | 1,83                       | 12331         | 2,28                       |
| Fatal cardiovascular event     | 794                 | 0,10                       | 697           | 0,18                       | 6891                  | 0,10                       | 1240          | 0,23                       |

**Table S8. Crude incidence rates (IRs) and hazard ratios (HRs) and 95% confidence intervals (CI) for incident cardiovascular disease among patients with different types of psychiatric disorder, compared to their unaffected full siblings (sibling comparison) or matched reference population (population comparison), by time since psychiatric diagnosis (<1 year or ≥1 year)\***

|                                                               | Sibling comparison |                            |                    | Population comparison |                            |                  |
|---------------------------------------------------------------|--------------------|----------------------------|--------------------|-----------------------|----------------------------|------------------|
|                                                               | No. of cases       | IR (per 1000 person years) | HR (95% CI)        | No. of cases          | IR (per 1000 person years) | HR (95% CI)      |
| <b>&lt;1 year follow up</b>                                   |                    |                            |                    |                       |                            |                  |
| Full siblings/matched population controls                     | 4396               | 4,58                       | 1.0                | 39850                 | 4,62                       | 1.0              |
| 1. Non-affective psychotic disorders                          | 124                | 9,06                       | 2.12 (1.61-2.78)   | 229                   | 11,70                      | 2.02 (1.75-2.33) |
| 1.1 Schizophrenia                                             | 14                 | 6,10                       | 3.62 (1.36-9.64)   | 31                    | 9,30                       | 1.36 (0.93-1.98) |
| 1.2 non-affective psychotic disorders excluding schizophrenia | 110                | 9,66                       | 2.02 (1.52-2.68)   | 198                   | 12,20                      | 2.19 (1.87-2.55) |
| 2. Affective psychotic disorders                              | 115                | 9,74                       | 1.72 (1.30-2.29)   | 178                   | 10,18                      | 1.62 (1.38-1.90) |
| 2.1 Schizoaffective disorder                                  | 1                  | 3,99                       | 1.10 (0.08-15.08)  | 3                     | 8,25                       | 0.98 (0.30-3.24) |
| 2.2 Bipolar disorder                                          | 57                 | 9,35                       | 1.60 (1.08-2.36)   | 93                    | 10,15                      | 1.55 (1.24-1.93) |
| 2.3 other affective psychotic disorders                       | 57                 | 10,43                      | 1.90 (1.26-2.88)   | 82                    | 10,31                      | 1.76 (1.39-2.23) |
| 3. Substance misuse                                           | 1056               | 11,01                      | 2.11 (1.91-2.34)   | 1880                  | 13,14                      | 1.98 (1.88-2.08) |
| 3.1 Alcohol misuse                                            | 916                | 12,47                      | 2.08 (1.87-2.32)   | 1622                  | 15,03                      | 1.95 (1.84-2.05) |
| 3.2 Drug misuse                                               | 84                 | 6,97                       | 2.80 (1.93-4.05)   | 148                   | 7,79                       | 2.39 (1.99-2.87) |
| 3.3 Other substance misuse                                    | 56                 | 5,40                       | 1.81 (1.19-2.74)   | 110                   | 6,83                       | 2.05 (1.67-2.52) |
| 4. Non-psychotic mood disorders                               | 828                | 8,18                       | 1.61 (1.45-1.78)   | 1447                  | 9,87                       | 1.70 (1.60-1.79) |
| 5. Anxiety and stress related disorders                       | 1443               | 8,49                       | 1.88 (1.74-2.04)   | 2477                  | 10,04                      | 1.94 (1.86-2.03) |
| 5.1 Anxiety disorder                                          | 752                | 9,17                       | 2.13 (1.90-2.38)   | 1297                  | 10,81                      | 2.18 (2.05-2.31) |
| 5.2 Obsessive-compulsive disorder (OCD)                       | 17                 | 2,04                       | 0.83 (0.45-1.53)   | 29                    | 2,58                       | 0.91 (0.62-1.33) |
| 5.3 Post-traumatic stress disorder (PTSD)                     | 432                | 7,45                       | 1.71 (1.48-1.96)   | 734                   | 8,67                       | 1.84 (1.70-2.00) |
| 5.4 Other stress-related disorder                             | 242                | 11,19                      | 1.73 (1.43-2.09)   | 417                   | 13,59                      | 1.67 (1.50-1.85) |
| 6. Eating disorders                                           | 62                 | 3,80                       | 5.90 (3.55-9.81)   | 77                    | 3,70                       | 2.98 (2.31-3.85) |
| 6.1 Anorexia nervosa                                          | 33                 | 4,89                       | 21.36 (6.22-73.32) | 36                    | 4,34                       | 4.91 (3.29-7.33) |
| 6.2 Bulimia nervosa                                           | 4                  | 2,34                       | 2.28 (0.54-9.54)   | 5                     | 2,22                       | 1.17 (0.46-2.96) |
| 6.3 Other eating disorder                                     | 25                 | 3,18                       | 3.87 (1.97-7.62)   | 36                    | 3,51                       | 2.52 (1.75-3.65) |
| 7. Personality disorders                                      | 39                 | 5,11                       | 2.42 (1.46-4.00)   | 70                    | 6,14                       | 1.60 (1.24-2.06) |
| 8. Attention deficit hyperactivity disorder (ADHD)            | 147                | 2,99                       | 2.02 (1.56-2.62)   | 201                   | 2,83                       | 2.49 (2.13-2.91) |
| 9. Autism spectrum disorder (ASD)                             | 19                 | 1,14                       | 1.27 (0.66-2.45)   | 33                    | 1,42                       | 1.34 (0.93-1.93) |
| 10. Intellectual disability                                   | 60                 | 4,77                       | 2.26 (1.49-3.41)   | 89                    | 5,01                       | 2.16 (1.71-2.73) |
| 11. Others                                                    | 242                | 6,26                       | 1.62 (1.34-1.95)   | 424                   | 7,62                       | 1.89 (1.70-2.10) |
|                                                               |                    |                            |                    |                       |                            |                  |
| <b>≥1 year follow up</b>                                      |                    |                            |                    |                       |                            |                  |

|                                                               |       |       |                  |        |       |                  |
|---------------------------------------------------------------|-------|-------|------------------|--------|-------|------------------|
| Full siblings/matched population controls                     | 63468 | 7,95  | 1.0              | 528869 | 7,62  | 1.0              |
| 1. Non-affective psychotic disorders                          | 1051  | 9,02  | 1.18 (1.08-1.29) | 1690   | 10,49 | 1.16 (1.10-1.22) |
| 1.1 Schizophrenia                                             | 218   | 8,83  | 1.21 (0.99-1.47) | 372    | 10,78 | 1.15 (1.03-1.28) |
| 1.2 non-affective psychotic disorders excluding schizophrenia | 833   | 9,07  | 1.18 (1.07-1.30) | 1318   | 10,42 | 1.16 (1.10-1.23) |
| 2. Affective psychotic disorders                              | 918   | 10,14 | 1.17 (1.07-1.29) | 1491   | 11,54 | 1.08 (1.03-1.14) |
| 2.1 Schizoaffective disorder                                  | 17    | 5,92  | 0.78 (0.41-1.50) | 25     | 6,28  | 0.79 (0.52-1.19) |
| 2.2 Bipolar disorder                                          | 326   | 10,77 | 1.10 (0.94-1.29) | 525    | 11,94 | 1.08 (0.99-1.19) |
| 2.3 Other affective psychotic disorders                       | 575   | 10,03 | 1.24 (1.09-1.39) | 941    | 11,59 | 1.09 (1.02-1.17) |
| 3. Substance misuse                                           | 8597  | 13,06 | 1.56 (1.50-1.61) | 13860  | 14,50 | 1.62 (1.59-1.65) |
| 3.1 Alcohol misuse                                            | 7278  | 14,37 | 1.55 (1.49-1.61) | 11800  | 16,33 | 1.59 (1.56-1.63) |
| 3.2 Drug misuse                                               | 730   | 8,51  | 1.57 (1.40-1.77) | 1129   | 8,52  | 1.88 (1.76-2.00) |
| 3.3 Other substance misuse                                    | 589   | 8,91  | 1.67 (1.46-1.90) | 931    | 9,25  | 1.60 (1.49-1.72) |
| 4. Non-psychotic mood disorders                               | 6065  | 10,19 | 1.24 (1.20-1.29) | 9795   | 11,62 | 1.27 (1.25-1.30) |
| 5. Anxiety and stress related disorders                       | 10884 | 9,13  | 1.33 (1.29-1.36) | 17304  | 10,22 | 1.37 (1.34-1.39) |
| 5.1 Anxiety disorder                                          | 4319  | 8,84  | 1.39 (1.33-1.46) | 7077   | 10,11 | 1.41 (1.38-1.45) |
| 5.2 Obsessive-compulsive disorder (OCD)                       | 222   | 4,32  | 0.99 (0.82-1.20) | 340    | 4,96  | 1.09 (0.98-1.23) |
| 5.3 Post-traumatic stress disorder (PTSD)                     | 4435  | 9,20  | 1.29 (1.24-1.35) | 6899   | 10,00 | 1.35 (1.32-1.38) |
| 5.4 Other stress-related disorder                             | 1908  | 11,24 | 1.32 (1.23-1.41) | 2988   | 12,76 | 1.34 (1.29-1.39) |
| 6. Eating disorders                                           | 325   | 2,66  | 1.60 (1.36-1.88) | 410    | 2,65  | 1.21 (1.09-1.34) |
| 6.1 Anorexia nervosa                                          | 120   | 2,24  | 1.46 (1.12-1.91) | 152    | 2,34  | 1.20 (1.01-1.42) |
| 6.2 Bulimia nervosa                                           | 31    | 3,00  | 1.08 (0.67-1.73) | 38     | 2,84  | 1.34 (0.96-1.89) |
| 6.3 Other eating disorder                                     | 174   | 2,98  | 1.87 (1.49-2.35) | 220    | 2,88  | 1.19 (1.04-1.37) |
| 7. Personality disorders                                      | 519   | 6,67  | 1.28 (1.13-1.46) | 825    | 7,27  | 1.36 (1.26-1.46) |
| 8. Attention deficit hyperactivity disorder (ADHD)            | 535   | 2,65  | 1.40 (1.23-1.59) | 824    | 2,85  | 1.81 (1.68-1.95) |
| 9. Autism spectrum disorder (ASD)                             | 144   | 1,55  | 1.05 (0.82-1.33) | 214    | 1,71  | 1.08 (0.93-1.24) |
| 10. Intellectual disability                                   | 456   | 4,34  | 1.40 (1.22-1.61) | 703    | 4,83  | 1.44 (1.33-1.56) |
| 11. Other mental disorders                                    | 3750  | 9,03  | 1.40 (1.34-1.47) | 5861   | 10,06 | 1.50 (1.46-1.55) |

\*Cox regression models, stratified by family identifiers in sibling comparison and matching identifiers (birth year and sex) in population comparison, adjusting for sex, birth year, educational level, individualized family income, cohabitation status, history of somatic disease and family history of cardiovascular disease. Time since index date was used as underlying time scale.

**Figure S1. Flowchart of study design and study participants for Danish replication cohort**

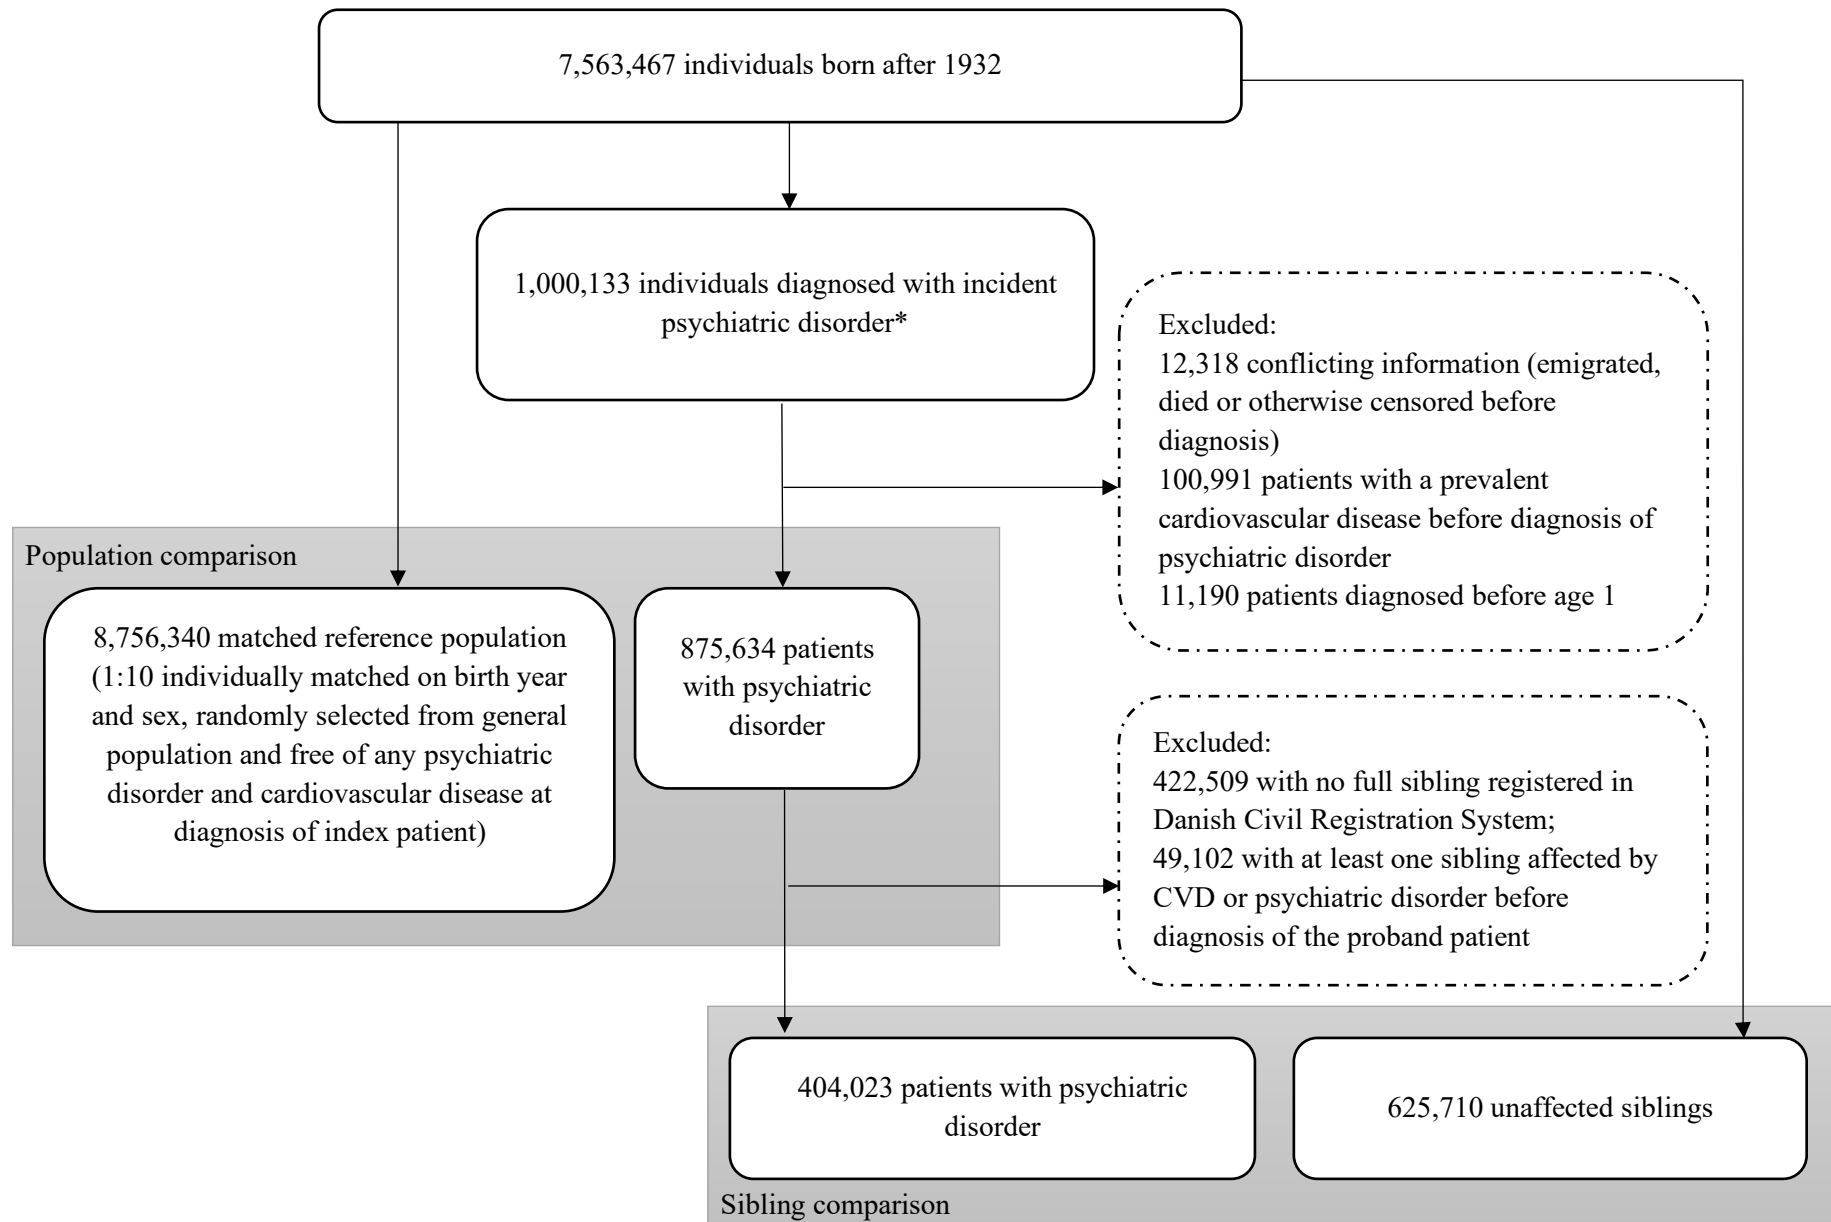



\* Incident psychiatric disorders (main and auxiliary) were identified from the Danish National Patient Register (1977-01-01 to 2016-12-31) and Danish Psychiatric Central Research Register (1969-01-01 to 2016-12-31).

Figure S2. Schematic diagram for analyses and used datasets across three countries.

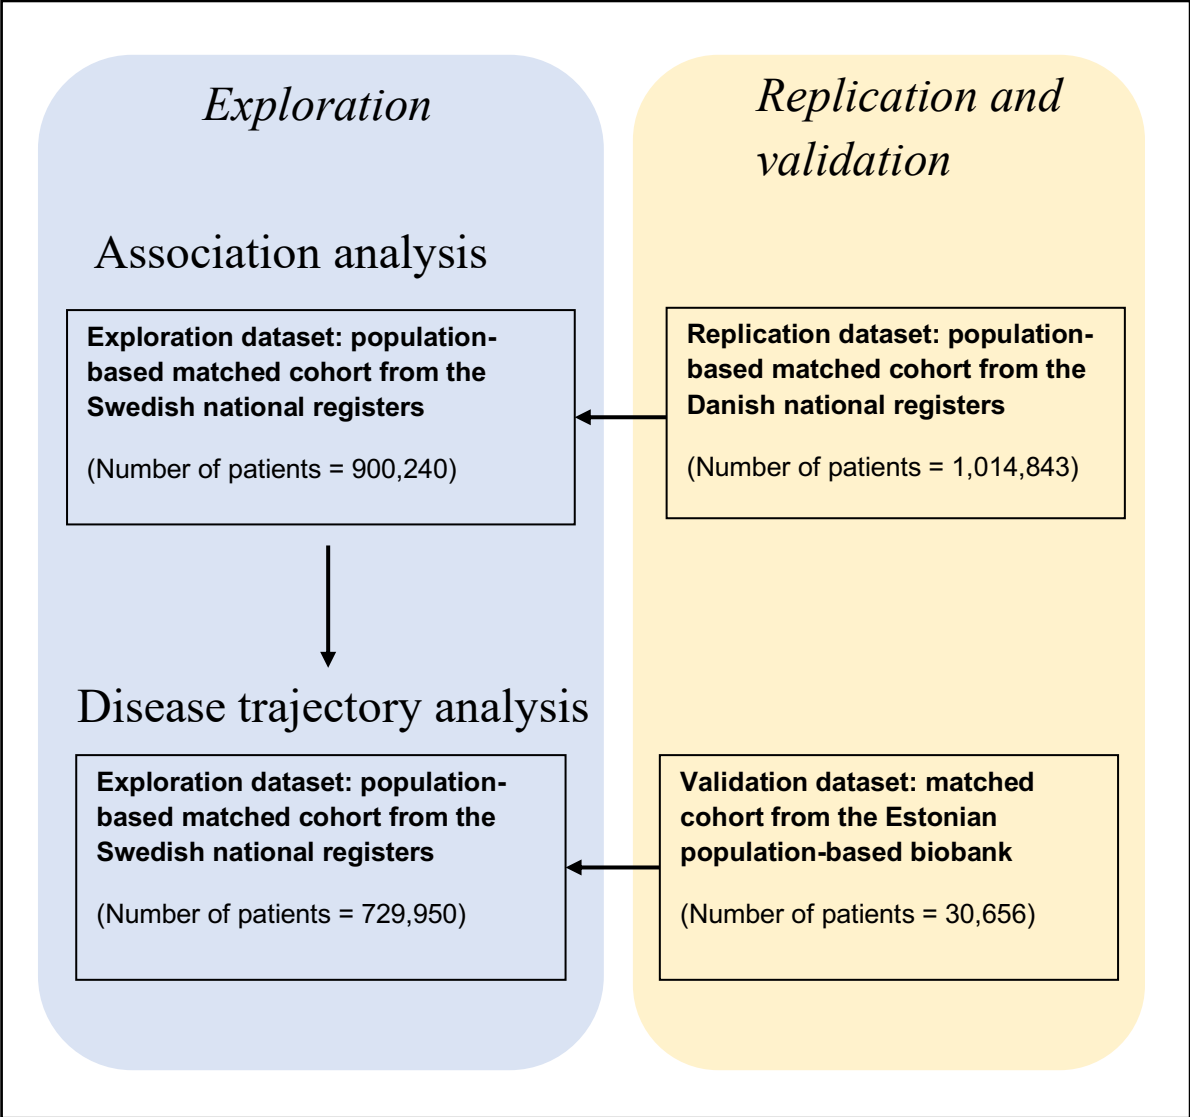

**Figure S3. Disease trajectories toward different cardiovascular diseases among patients with psychiatric disorders (except for autism, N=729 950)\***

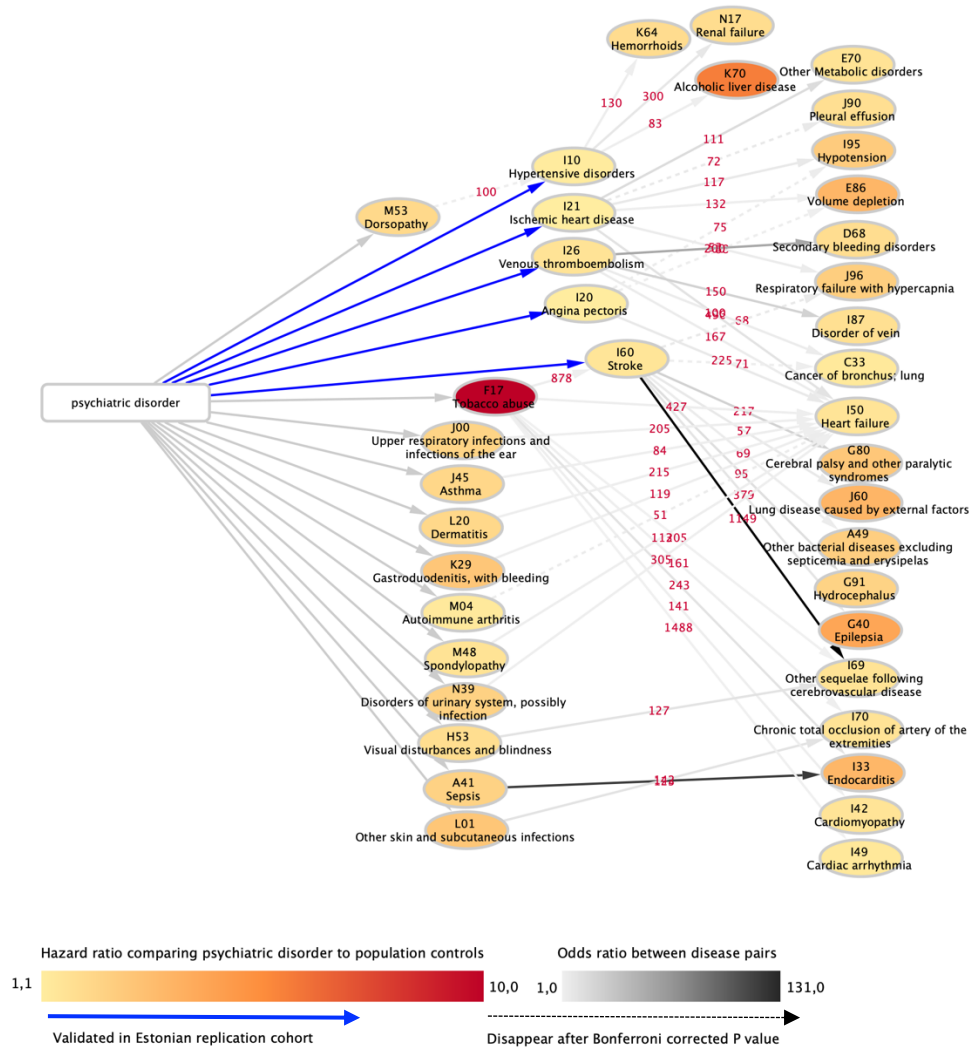

\*This figure illustrates disease trajectories with direct and indirect links between psychiatric disorders and incident cardiovascular disease. The ICD codes used to cluster medical conditions are shown in circle. The color of each circle represents the magnitude of the association (hazard ratio) between psychiatric disorders and each medical condition. The color of arrows connecting two circles indicates the odds ratio of the association between two medical conditions among psychiatric patients. The number on the arrow corresponds to the number of pairs with both medical conditions among psychiatric patients. The blue color of arrows indicates the trajectories were validated in Estonian replication cohort.

**Figure S4. Disease trajectories toward different cardiovascular diseases among patients with substance misuse, non-psychotic mood disorders, and anxiety and stress-related disorders\***

\*This figure illustrates disease trajectories with direct and indirect links between psychiatric disorders and incident cardiovascular disease. The ICD codes used to cluster medical conditions are shown in circle. The color of each circle represents the magnitude of the association (hazard ratio) between psychiatric disorders and each medical condition. The color of arrows connecting two circles indicates the odds ratio of the association between two medical conditions among psychiatric patients. The number on the arrow corresponds to the number of pairs with both medical conditions among psychiatric patients.

**A. Patients with substance misuse**

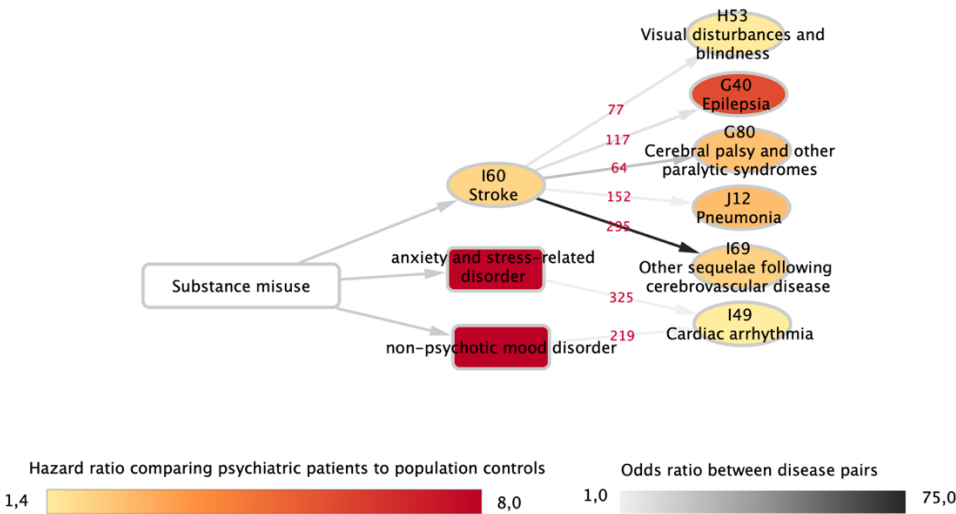

**B. Patients with non-psychotic mood disorders**

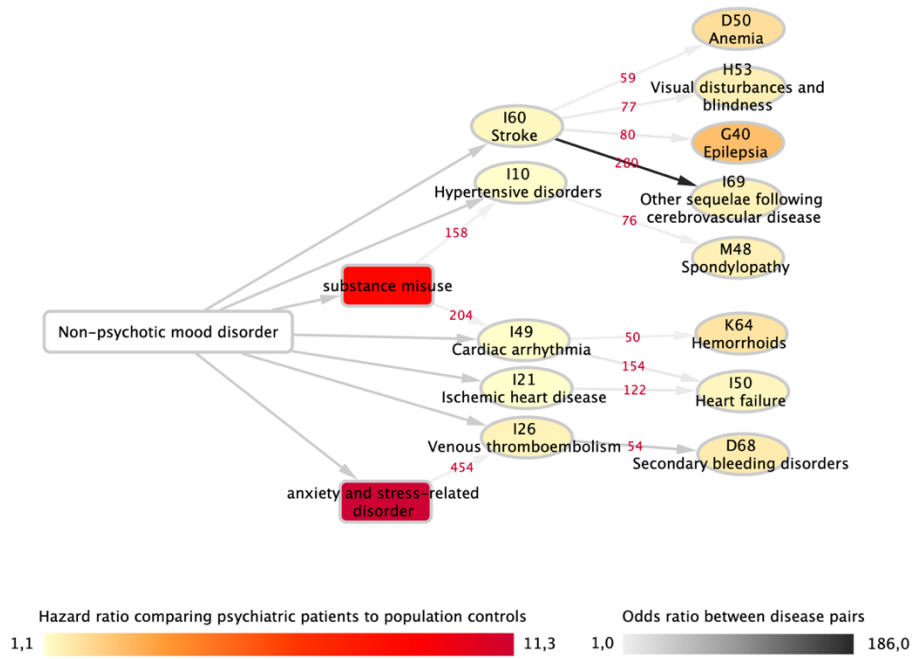

C. Patients with anxiety and stress-related disorders

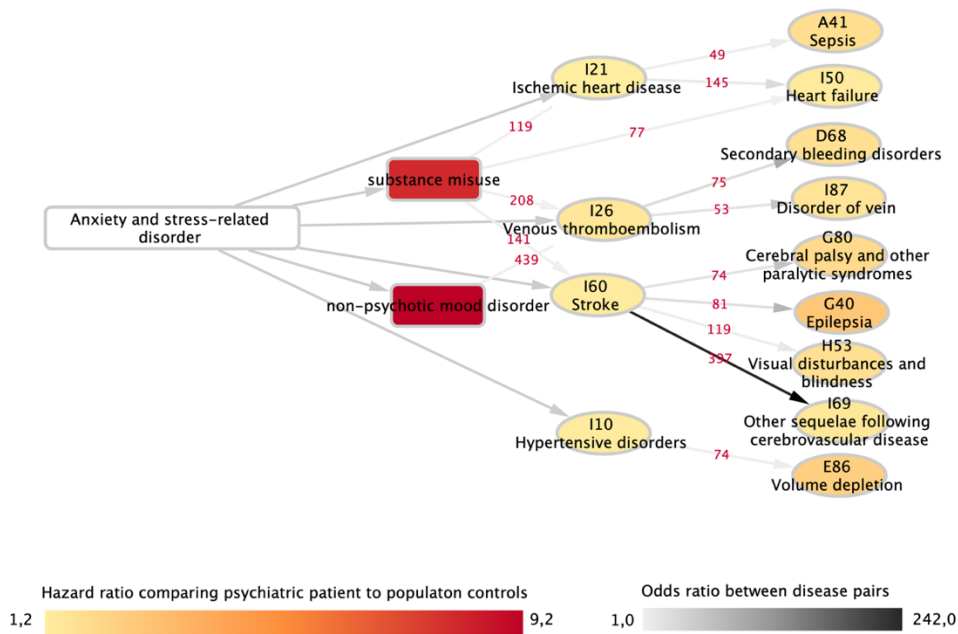

D. Illustration of cardiovascular disease identified from A-C. Red circle denotes direct links and blue circle denotes indirect links.

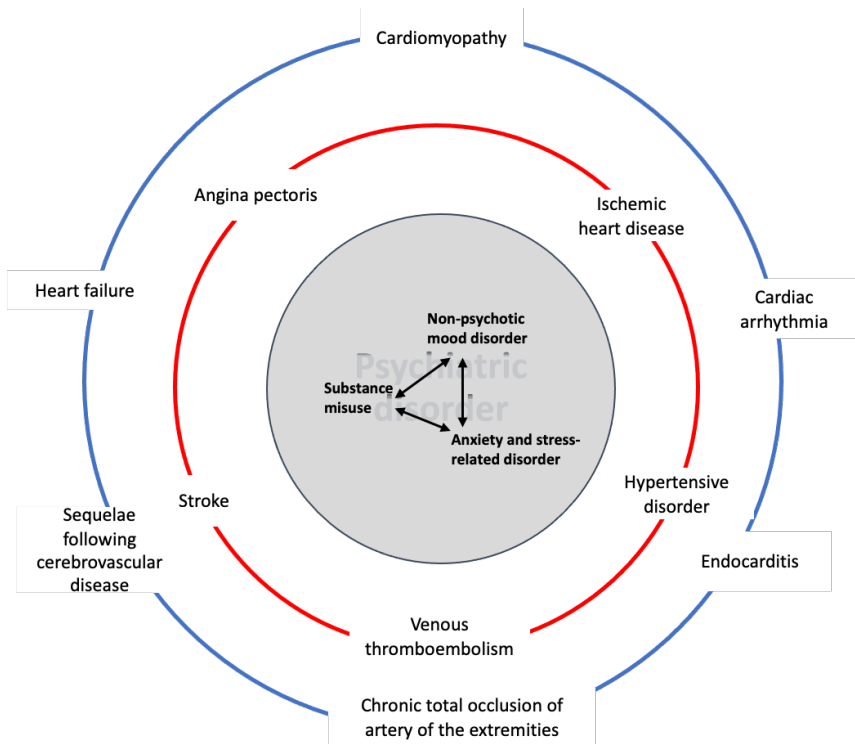

## **Section 1: Description of method - Danish replication cohort**

We identified a population of 7,563,467 persons residing during 1968-2016 in Denmark.

Using personal identification numbers uniquely assigned to all Danish residents, we found in total 1,000,133 individuals diagnosed with a first-onset of any psychiatric disorder between 1 January 1977 and 31 December 2016 from the Danish National Patient Register,<sup>1</sup> as well as between 1 January 1969 and 31 December 2016 from the Danish Psychiatric Central Research Register.<sup>2</sup> Patients diagnosed with psychiatric disorders under age 1 (N=11,190, possible congenital/developmental anomalies), with a prevalent CVD before diagnosis of psychiatric disorders (N=100,991), or with conflicting information (emigrated, died or otherwise censored before diagnosis, N=12,318) were excluded, leaving 875,634 patients with a newly diagnosed psychiatric disorder in the analysis (Appendix Figure S1 flowchart). We ascertained date of first psychiatric diagnosis as the index date for the exposed patients.

The Danish Civil registration system is complete from 1968 from when it includes all individuals born in Denmark. Through linkage with the Danish National Patient register (since 1977) and the Danish Psychiatric Central Research Register (since 1969) diagnostic information can be obtained. The Danish Multi-Generation Register includes nearly complete familial linkage for Danish residents born since 1968. Through the Register, we identified 625,710 unaffected full siblings for 404,023 patients with psychiatric disorders (46.1 % of all exposed patients) who were alive and free of psychiatric disorders and CVD before diagnosis of the index patient. We randomly selected up to 10 age- and sex-matched individuals from the study base using the method of incidence density sampling per exposed individual (N=8,756,340). The date of psychiatric diagnosis for the index patient was used as the index date for unaffected siblings and matched reference population.

All study participants were followed from the index date until first diagnosis of any CVD, death, emigration, first diagnosis of psychiatric disorders (for unaffected siblings and matched

reference population), or the end of the study period (31 December 2016), whichever occurred first.

### **Ascertainment of Psychiatric Disorders and Cardiovascular Disease**

We used the 8<sup>th</sup> and 10<sup>th</sup> revision of the International Classification of Diseases (ICD-8 and 10) codes to identify psychiatric disorders and CVD that were attended by specialized care, and their subtypes (ICD codes in below Table). We defined incident psychiatric disorders as any inpatient, emergency or outpatient visit with a psychiatric disorder as the main and auxiliary diagnoses from the Danish National Patient Register, or any visit as the main diagnosis from the Danish Psychiatric Central Research Register. CVD was ascertained as any first inpatient, emergency or outpatient visit with CVD as the primary diagnosis (according to Danish National Patient Register). We also identified fatal cardiovascular event as any death within 30 days of incident CVD according to the Danish Causes of Death Register and the Danish National Patient Register. We classified psychiatric disorders as Psychiatric and behavioral disorders due to psychoactive substance use (e.g., use of alcohol, cannabis, cocaine, opioids, etc.), schizophrenia and related disorders (e.g., schizoaffective disorders and other psychotic disorders), mood disorders( e.g., bipolar, and depressive disorders), anxiety disorders (e.g., neurotic, stress-related, and somatoform disorders: anxiety due to phobias, and obsessive-compulsive disorders), eating disorders (e.g., anorexia and bulimia nervosa), specific personality disorders, intellectual disabilities, developmental disorders (e.g., language and scholastic skill deficits, autism spectrum disorders) and behavioral and emotional disorders (e.g., attention-deficit hyperactivity disorder, conduct disorders). We categorized CVD as ischemic heart disease, cerebrovascular disease, emboli and thrombosis, hypertensive disease, heart failure, and arrhythmia/conduction disorder.

### **Covariates**



Having any of the following conditions before the index date was defined as having a history of somatic diseases: dyslipidemia, diabetes mellitus (diabetes mellitus type 1, diabetes mellitus type 2, gestational diabetes mellitus), chronic pulmonary diseases, connective tissue diseases, renal diseases (including chronic kidney diseases), liver diseases (including chronic liver diseases), ulcer diseases, HIV infection/AIDS, any malignancy (including leukemia, lymphoma and metastatic cancer). We considered a family history of CVD as a diagnosis of any CVD among biological parents and full siblings of the study participants before the index date according to the Danish National Patient Register.

**Table. International Classification of Diseases (ICD) codes for exposure, outcome, and covariates used in Danish replication cohort.**

| Psychiatric disorders                                                                                                                  | Abbreviation            | ICD-10  | ICD-8 equivalents                                                     | Start of follow-up (earliest possible age at onset, years) |
|----------------------------------------------------------------------------------------------------------------------------------------|-------------------------|---------|-----------------------------------------------------------------------|------------------------------------------------------------|
| Psychiatric and behavioral disorders due to psychoactive substance use E.g., use of alcohol, cannabis, cocaine, opioids, etc.          | Substance use disorders | F10-F19 | 291.x9, 294.39, 303.x9, 303.20, 303.28, 303.90, 304.x9                | 10                                                         |
| Schizophrenia and related disorders E.g., schizoaffective disorders and other psychotic disorders                                      | Schizophrenia           | F20-F29 | 295.x9, 296.89, 297.x9, 298.29-298.99, 299.04, 299.05, 299.09, 301.83 | 10                                                         |
| Mood disorders E.g., bipolar, and depressive disorders                                                                                 | Mood disorders          | F30-F39 | 296.x9 (excluding 296.89), 298.09, 298.19, 300.19, 300.49             | 10                                                         |
| Anxiety disorders E.g., neurotic, stress-related, and somatoform disorders: anxiety due to phobias, and obsessive-compulsive disorders | Anxiety disorders       | F40-F48 | 300.x9 (excluding 300.49), 305.x9, 305.68, 307.99                     | 5                                                          |
| Eating disorders, E.g., anorexia and bulimia nervosa                                                                                   | Eating disorders        | F50     | 305.60, 306.50, 306.58, 306.59                                        | 1                                                          |
| Specific personality disorders                                                                                                         | Personality disorders   | F60     | 301.x9 (excluding 301.19), 301.80, 301.81, 301.82, 301.84             | 10                                                         |
| Intellectual disabilities                                                                                                              | Intellectual disorders  | F70-F79 | 311.xx, 312.xx, 313.xx, 314.xx, 315.xx                                | 1                                                          |
| Developmental disorders E.g., language and scholastic skill deficits, autism spectrum disorders                                        | Developmental disorders | F80-F84 | 299.00, 299.01, 299.02, 299.03                                        | 1                                                          |
| Behavioral and emotional disorders E.g., attention-deficit hyperactivity disorder, conduct disorders                                   | Behavioral disorders    | F90-F98 | 306.x9, 308.0x                                                        | 1                                                          |

References:

1. The Danish National Patient Register - Elsebeth Lynge, Jakob Lynge Sandegaard, Matejka Rebolj, 2011. Accessed November 1, 2022. <https://journals.sagepub.com/doi/10.1177/1403494811401482>
2. Mors O, Perto GP, Mortensen PB. The Danish Psychiatric Central Research Register. *Scand J Public Health*. 2011;39(7\_suppl):54-57. doi:10.1177/1403494810395825

## **Section 2: Description of method - disease trajectory analysis**

Disease trajectory analysis was performed to identify all disease trajectories following any psychiatric disorder, as well as after each type of psychiatric disorder, including non-affective psychotic disorder, affective psychotic disorder, substance misuse, non-psychotic mood disorder, anxiety and stress-related disorder, eating disorder, and attention deficit hyperactivity disorder (ADHD). We included psychiatric patients diagnosed during 2001 and 2016, due to the inclusion of outpatient health visit from 2001 and onward became largely available in the Swedish Patient Register. We used 3-digit ICD-10 codes for medical condition identification and diagnoses of medical conditions were based on main diagnosis in the register. We excluded diagnoses related to pregnancy, childbirth, perinatal conditions and unclassified symptoms or signs. We considered the diagnosis and date of first health record if multiple records with same medical condition were identified for the same patient.

### **Steps of analysis**

Step 1: Phenome-wide association analyses (PheWAS) using conditional Cox regression model, to investigate the risk of all medical conditions in individuals with a psychiatric disorder compared to matched population controls. For each outcome in Cox regression analysis, a sub-cohort was formed by excluding individuals with a previous history of the outcome disease before start of follow-up (i.e., date of psychiatric disorder or index date), and follow-up of the individuals in the sub-cohort ended on date of the outcome disease diagnosis, death, emigration or end of study, whichever came first. To ensure statistical power, we limited the analyses to diseases that occurred in at least 100 patients with a psychiatric disorder. After the PheWAS, only medical conditions with  $p\text{-value} < \text{Bonferroni corrected threshold}$  and hazard ratio (HR)  $> 1$  were considered in the second step.

Step 2: to identify disease 1 (D1) and disease 2 (D2) pairs with explicit temporal order (i.e., disease 2 occurred after disease 1) among patients with a psychiatric disorder. When assessing disease trajectories related to cardiovascular diseases (CVD), we included only D1 or D2 to be any type of CVD in this step. D1 and D2 can be any medical condition when identifying disease trajectories of any medical condition. For each D1→D2 disease pair that was experienced by at least 50 psychiatric patients, binomial test was conducted to investigate whether significantly more patients ( $>50\%$ ) had D1 diagnosed before D2 among those with both D1 and D2 diagnoses. Patients with the same D1 and D2 diagnoses date were not included in the analysis. D1→D2 disease pairs with binomial test  $p\text{-value} < 0.0001$  (Bonferroni corrected P value in sensitivity analysis) threshold were forwarded to the third step.

Step 3: We used nested case-control study design and conditional logistic regression analyses to assess the magnitude of the associations between each disease pair. For each disease pair included, we constructed a nested case-control dataset using intensity density sampling, by considering D2 as outcome and D1 as exposure. In each case-control dataset, at most 2 controls were matched to each case, based on sex and year of birth as well as year of psychiatric diagnosis. Psychiatric patients with a history of D1 or D2 before start of follow-up were not included in the analysis.

### **Section 3: Replication of disease trajectories with direct link to incident cardiovascular diseases in Estonian Biobank (EstBB)**

#### **1. Description of the EstBB database**

The Estonian Biobank (EstBB) is a population-based biobank of the Institute of Genomics at the University of Tartu. The current cohort size is more than 207,000 individuals, reflecting the age, sex and geographical distribution of the adult population in Estonia. All activities at the EstBB are conducted according to the Human Genes Research Act of Estonia and all the participants have signed a broad informed consent. In addition to self-reported data about participants' health status, lifestyle, and diet, the EstBB database is regularly linked with national registries, hospital databases, and the database of the national health insurance fund, which holds the treatment and service bills.

#### **2. Construction of replication cohort**

For the replication analysis of the association between psychiatric disorder and first-onset cardiovascular disease, the diagnoses in ICD-10 coding for every participant ( $N = 205,520$ ) were obtained from the national health insurance fund from January 1, 2004 until December 31, 2020 (flowchart below). For individuals with chronic disorders (e.g, any psychiatric disorder, hypertension, ischemic heart disease) or angina pectoris, we restricted to individuals with at least two diagnoses within six months. For individuals with stroke or venous thromboembolism, one diagnosis was sufficient.

In order to study the association between first psychiatric disorder and subsequent cardiovascular disease (CVD), individuals diagnosed with any psychiatric disorder in 2004-2005 were excluded ( $N=14,501$ ). Also, patients with a prevalent CVD before diagnosis of psychiatric disorder based on the registry data or self-reported data before 2004 were excluded ( $N=13,675$  and  $N=631$ , respectively). In addition, we excluded individuals without information from any of the databases ( $N=3,173$ ) or who died within six months after the first psychiatric diagnosis ( $N=11$ ). The final dataset for the replication analyses included 173,979 individuals. Of them, 30,656 were individuals diagnosed with any psychiatric disorder.

### 3. Flowchart

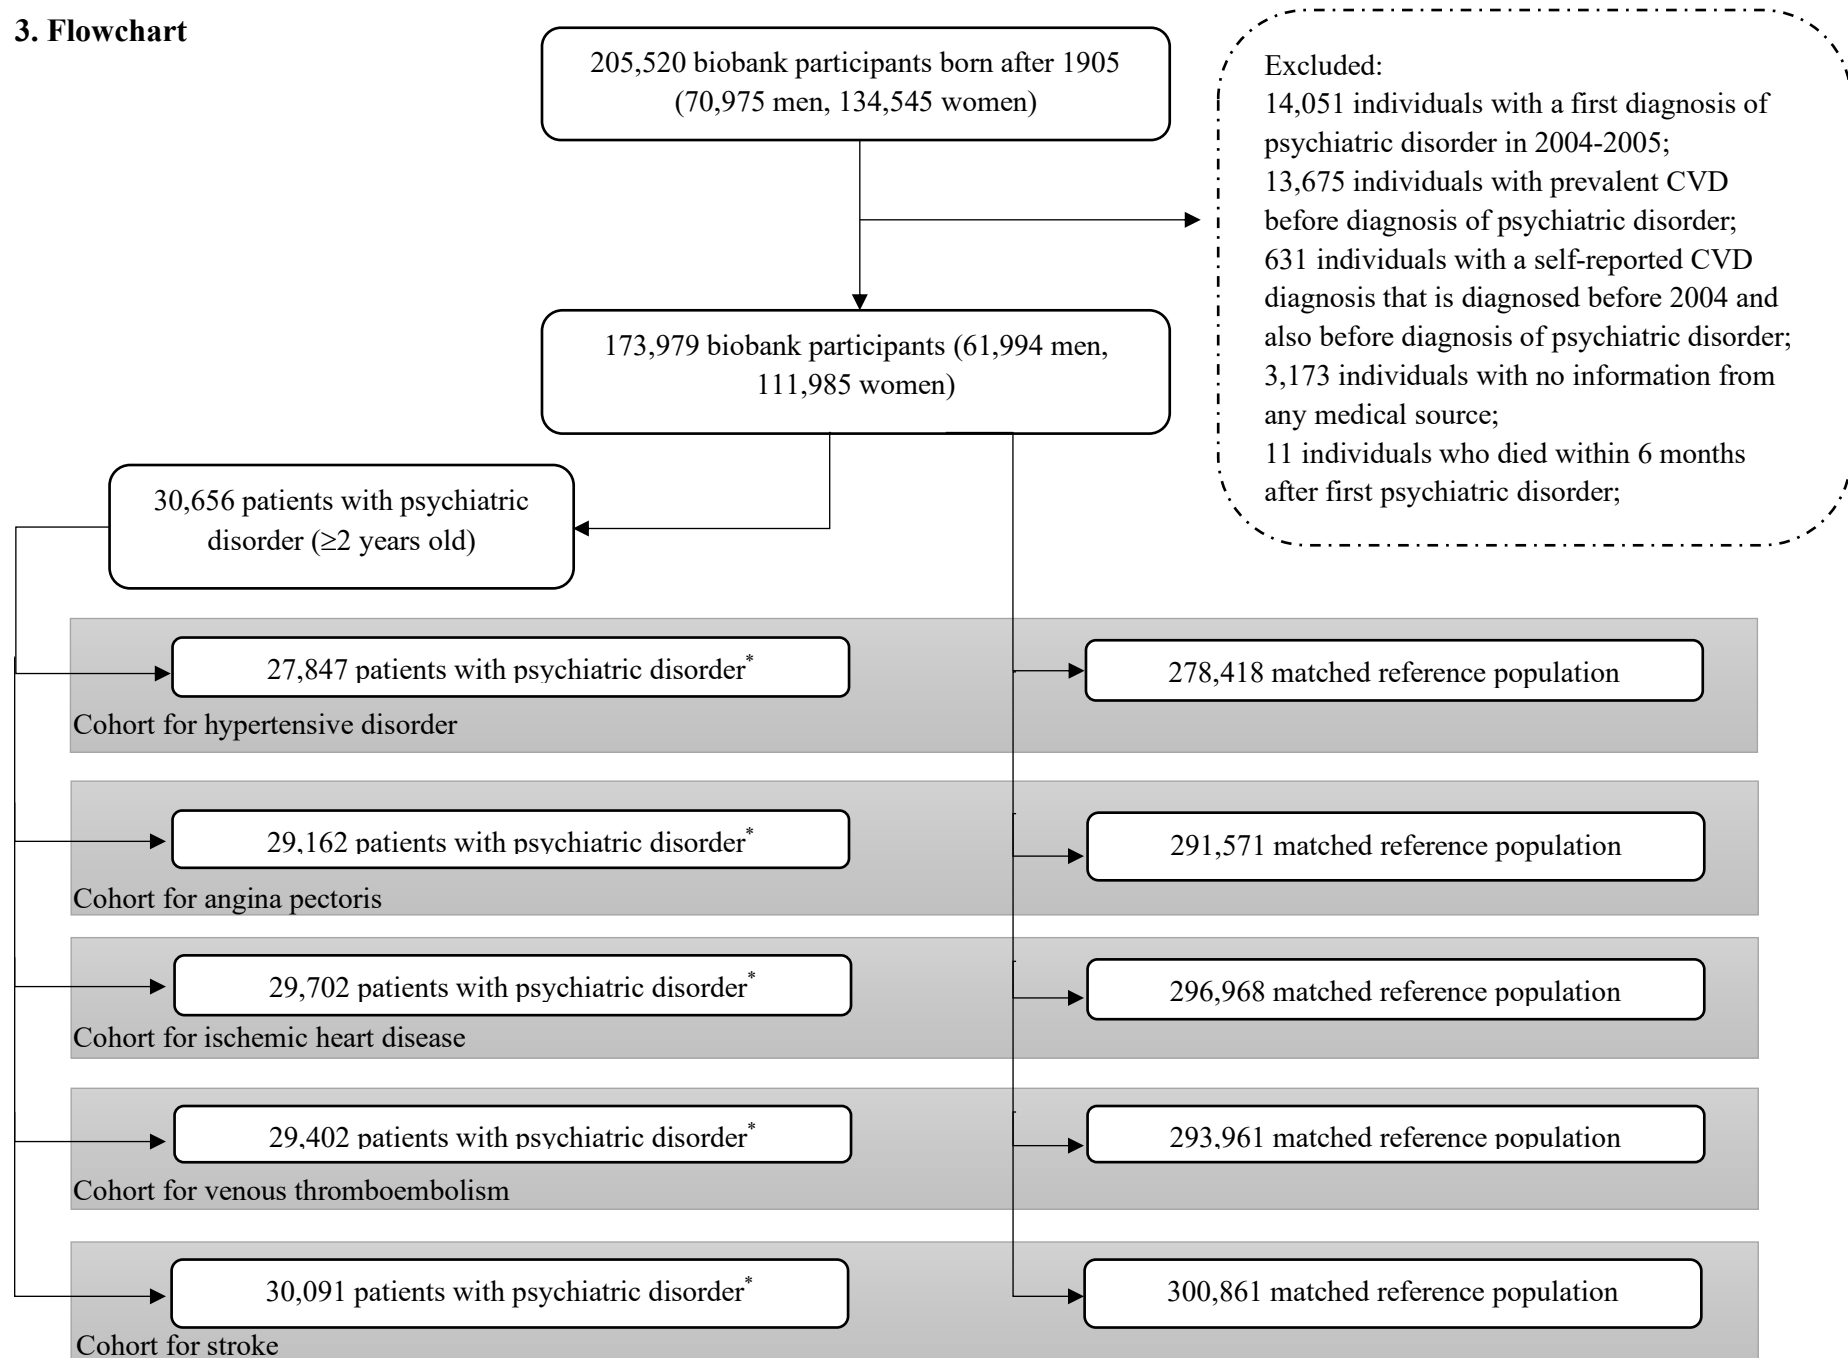

\*Each patient with a psychiatric disorder was matched with up to 10 reference population, based on birth year and sex. Psychiatric patients with outcome disease diagnosed within six months of psychiatric diagnosis were excluded from each cohort.

## 4. Methods

We estimated the risk of five CVDs following the diagnosis of any psychiatric disorder identified from disease trajectory analysis in Swedish cohort. The identified five CVDs were: hypertensive disorder, angina pectoris, ischemic heart disease, venous thromboembolism, stroke (ICD-10 codes and combined codes shown below). We assessed hazard ratios of these five CVDs comparing psychiatric patients to matched reference population using stratified Cox regression models.

| Disease                | Combined code | ICD-10 codes |
|------------------------|---------------|--------------|
| Hypertensive disorders | I10           | I10-I15      |
| Angina pectoris        | I20           | I20          |
| Ischemic heart disease | I21           | I21-I25      |
| Venous thromboembolism | I26           | I26, I80-I82 |
| Stroke                 | I60           | I60-I67      |

For each individual with a psychiatric disorder, we selected 6-10 controls among individuals who were free of any psychiatric disorder and outcome disease within six months of the diagnosis of the index patient. Of note, individuals with at least one occurrence of chronic disorder (e.g, any psychiatric disorder, hypertension, ischemic heart disease) or angina pectoris that did not meet the requirement of two occurrence within six months were not selected as controls.

Stratified Cox regression was used to assess the risk of CVD in psychiatric patients compared to matched reference population. The start of follow-up was six months after indexed diagnosis of psychiatric disorder. The end of follow-up was the date of the CVD diagnosis of interest, date of death or end of follow-up period (December 31st, 2020), whichever occurred first. The R code used for modelling is shown below.

```
coxph(Surv(time = entry, time2 = exit, event = outcome_disease) ~ psychiatric_disorder + strata(Set), data)
```

The proportional hazard assumption was assessed based on the scaled Schoenfeld residuals using the *cox.zph()* function in R and graphical tests.



## Section 4: Output from each step of disease trajectory analysis

### 1. All psychiatric disorders (except for autism, N=729,950)

Step 1: A total of 482 medical conditions, 398 medical conditions with  $N \geq 100$  in patients with psychotic disorder. Among 398 medical conditions, the risks of 345 medical conditions were significantly increased in patients with psychotic disorder, compared with matched population controls.

Step 2: In a total of 12,078 disease pairs, 1,279 D1→D2 disease pairs had D1 or D2 as CVD, with  $N \geq 50$  and more D1 diagnosed before D2 (>50%) were selected. 72 D1→D2 disease pairs were identified with significantly more patients had D1 before D2.

Step 3: Among 72 disease pairs, 42 D1→D2 disease pairs had significantly increased risk of D1 before D2 diagnosis.

#### Flowchart

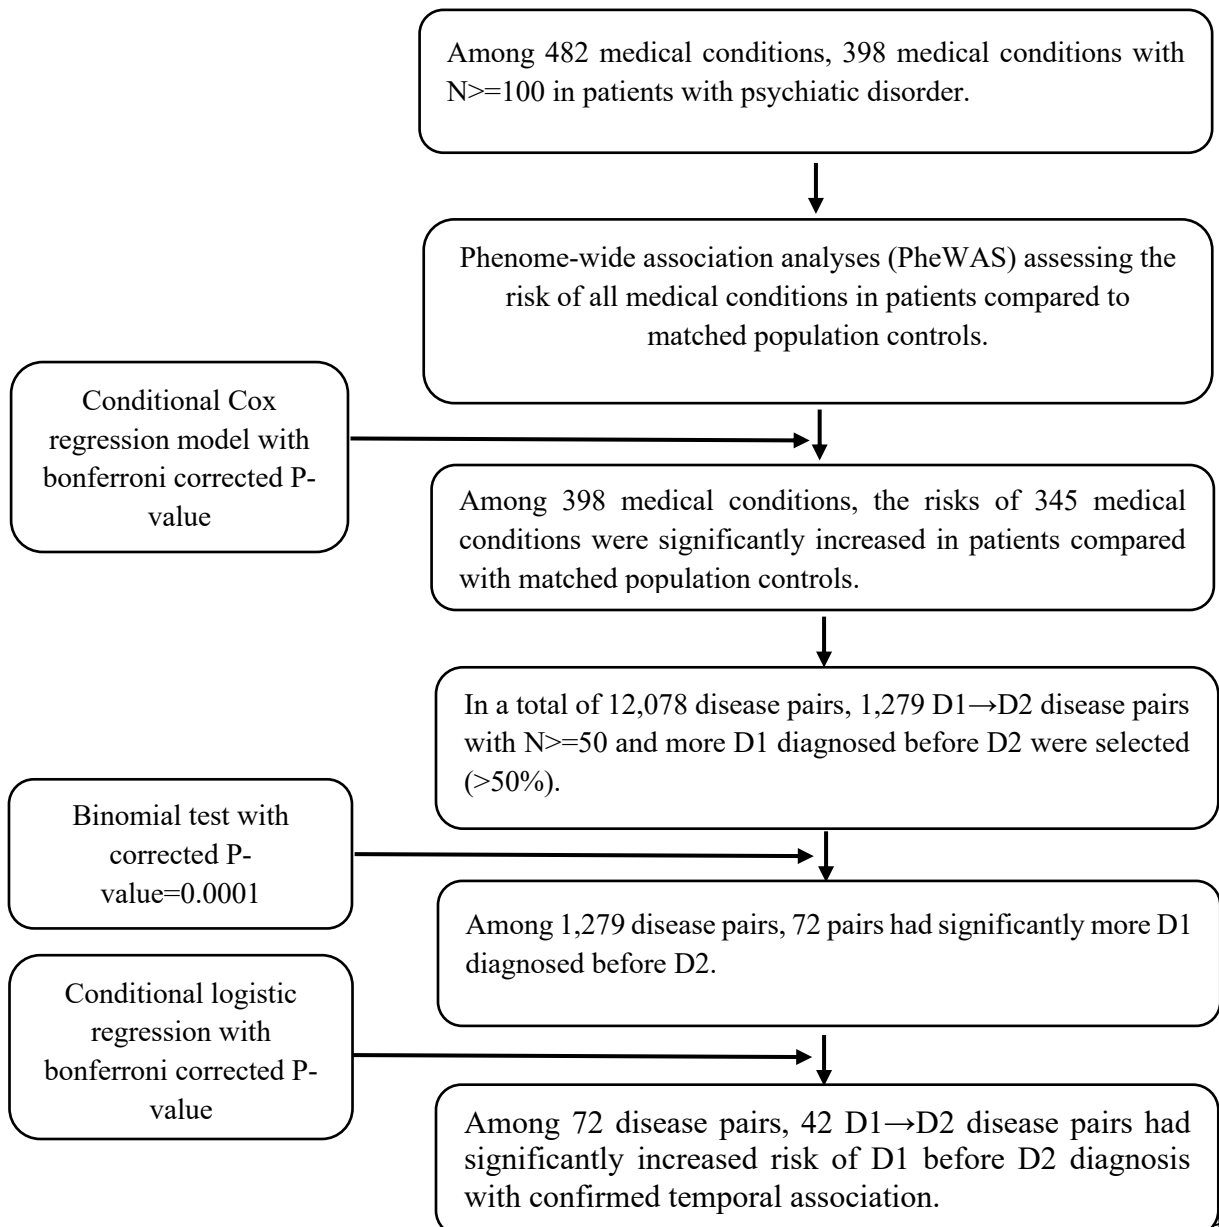

## 2. Substance misuse (N=124,189)

Step 1: A total of 481 medical conditions, 296 medical conditions with  $N \geq 100$  in patients with substance misuse. Among 296 medical conditions, the risks of 236 medical conditions were significantly increased in patients with substance misuse, compared with matched population controls.

Step 2: In a total of 5,954 disease pairs, 189 D1→D2 disease pairs had D1 or D2 as CVD, with  $N \geq 50$  and more D1 diagnosed before D2 (>50%) were selected. 12 D1→D2 disease pairs were identified with significantly more patients had D1 before D2.

Step 3: Among 12 disease pairs, 7 D1→D2 disease pairs had significantly increased risk of D1 before D2 diagnosis.

### Flowchart

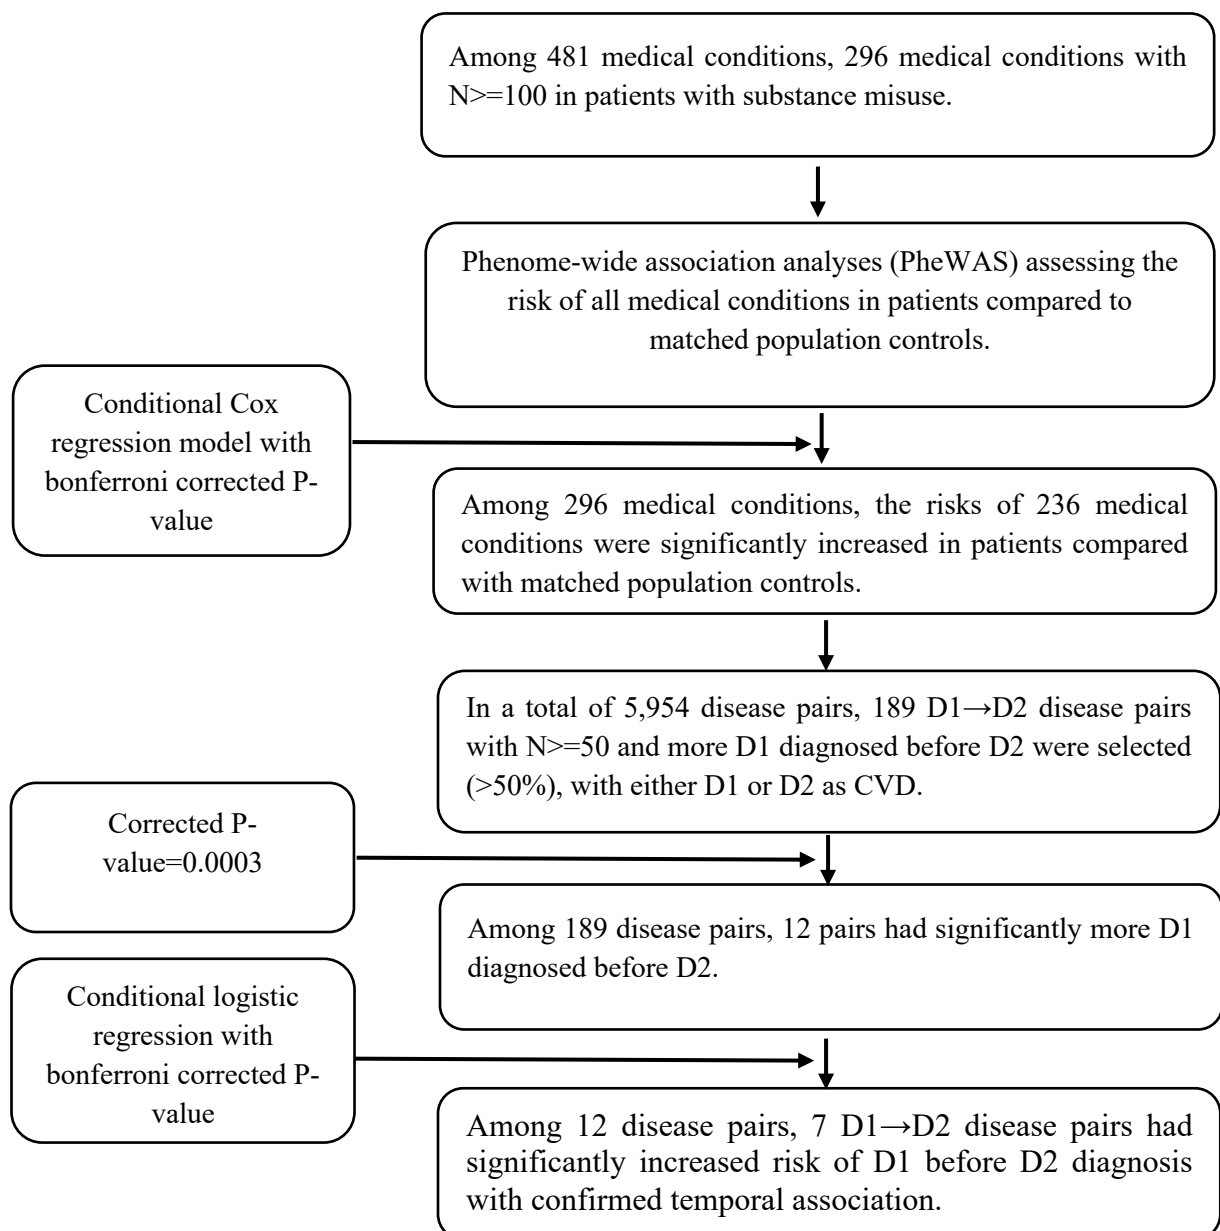

### 3. Non-psychotic mood disorders (N=159,055)

Step 1: A total of 483 medical conditions, 319 medical conditions with  $N \geq 100$  in patients with non-psychotic mood disorder. Among 319 medical conditions, the risks of 269 medical conditions were significantly increased in patients with non-psychotic mood disorder, compared with matched population controls.

Step 2: In a total of 5,786 disease pairs, 373 D1→D2 disease pairs had D1 or D2 as CVD, with  $N \geq 50$  and more D1 diagnosed before D2 ( $>50\%$ ) were selected. 25 D1→D2 disease pairs were identified with significantly more patients had D1 before D2.

Step 3: Among 25 disease pairs, 12 D1→D2 disease pairs had significantly increased risk of D1 before D2 diagnosis.

#### Flowchart

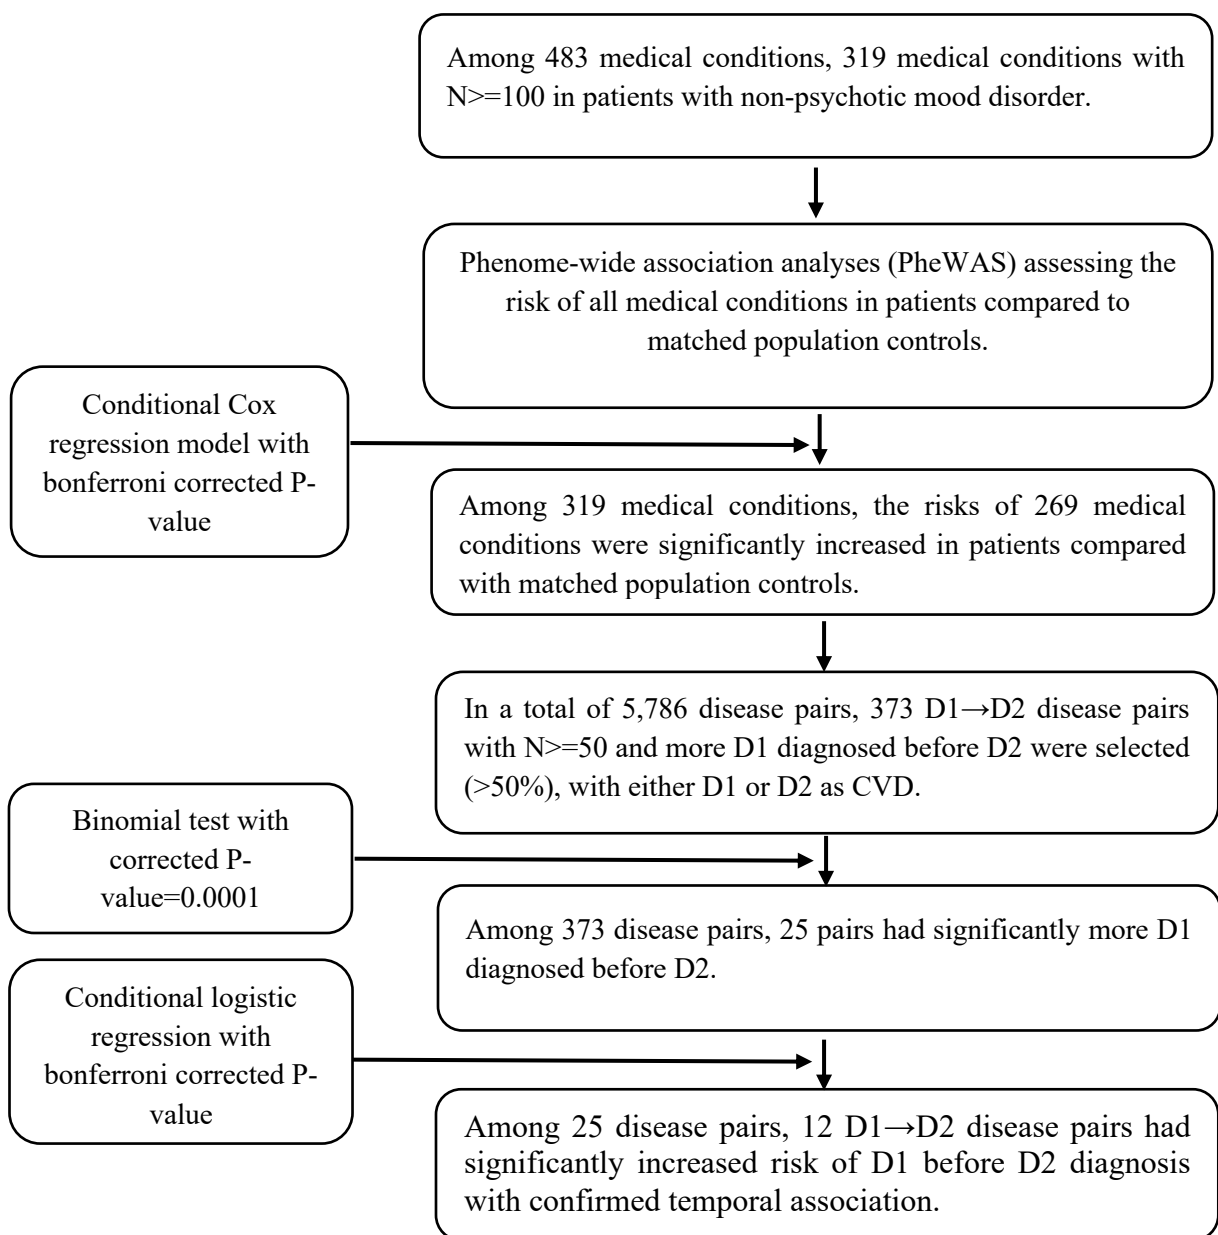

#### 4. Anxiety and stress-related disorders (N=260,110)

Step 1: A total of 484 medical conditions, 348 medical conditions with  $N \geq 100$  in patients with anxiety and stress-related disorders. Among 348 medical conditions, the risks of 299 medical conditions were significantly increased in patients with anxiety and stress-related disorders, compared with matched population controls.

Step 2: In a total of 7,592 disease pairs, 548 D1→D2 disease pairs had either D1 or D2 as CVD, with  $N \geq 50$  and more D1 diagnosed before D2 ( $>50\%$ ) were selected, among which, 25 D1→D2 disease pairs were identified with significantly more patients had D1 before D2.

Step 3: Among 25 disease pairs, 14 D1→D2 disease pairs had significantly increased risk of D1 before D2 diagnosis.

#### Flowchart

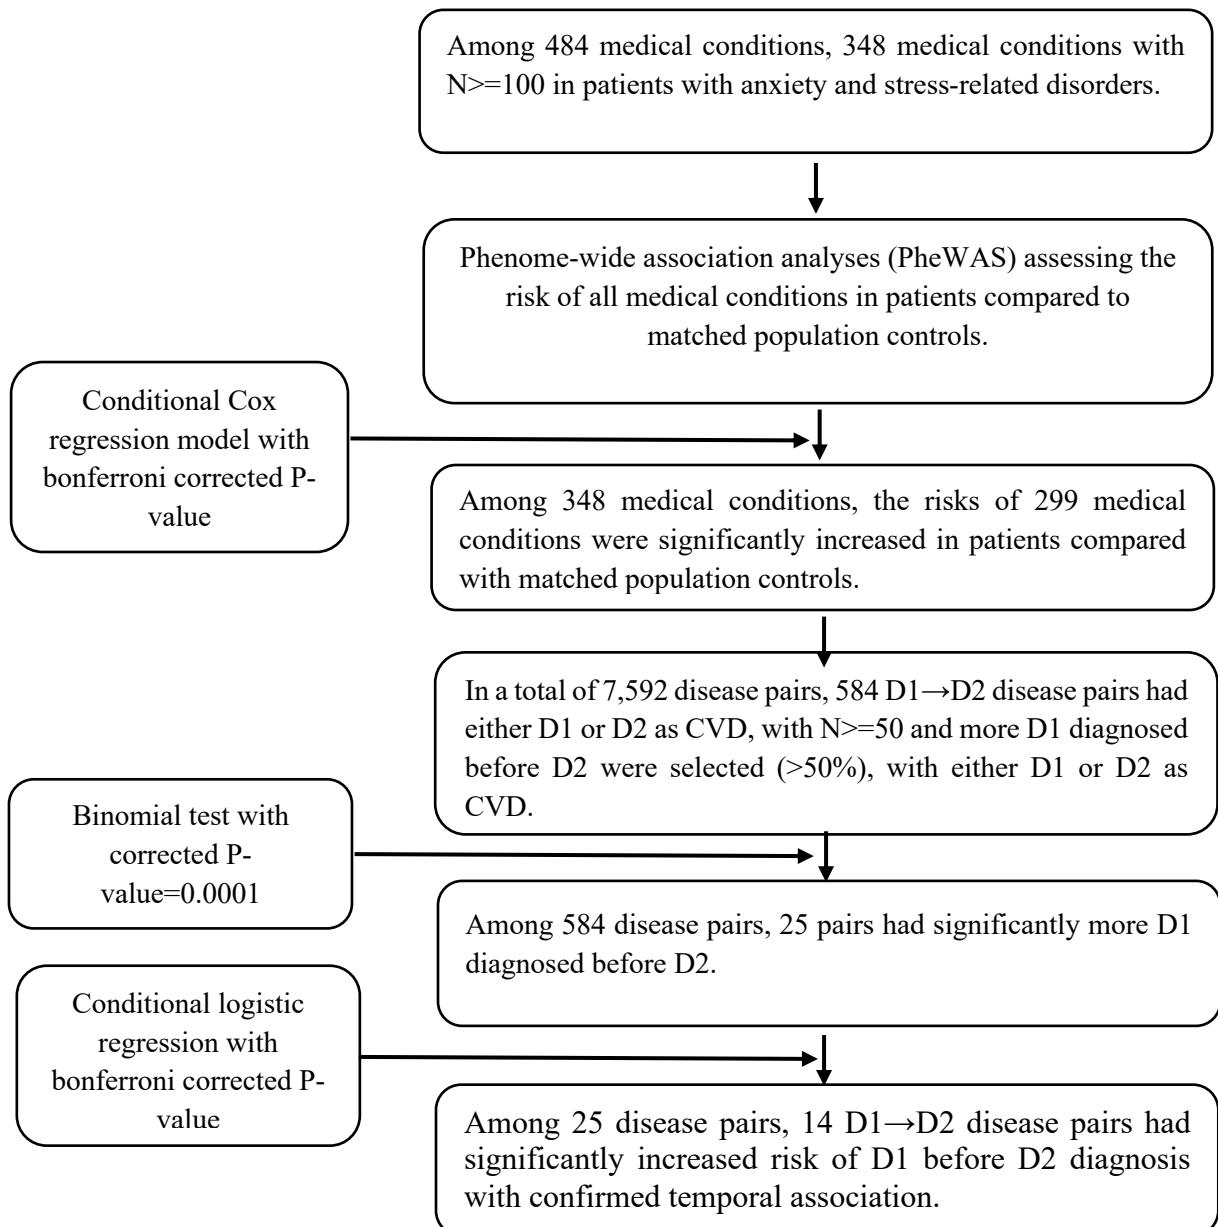

Supplement: mmc1.pdf [file mmc1.pdf]
